# Supplementary material
Source: Elsevier journal article supplement (https://www.sciencedirect.com/science/article/pii/S030028961000092X)
Supplement: mmc1 [file S030028961000092X:mmc1.doc]

Variables clínicas AUDIPOC España

| **Nº** | **VARIABLE** | **DEFINICIÓN** | **CARACTERÍSTICAS** | **ALERTAS Y RANGOS** |
| --- | --- | --- | --- | --- |
| **FORMULARIO PACIENTES (FP)** | | | | |
| 1 | FECHA_INCLUSION | Fecha de inclusión del caso |  | Fecha de inclusión del paciente en el estudio. Formato dd/mm/aaaa |
| 2 | FECHAMODIF | Fecha de modificación del caso |  | Fecha de la última modificación realizada en los datos del paciente. Formato dd/mm/aaaa |
| 3 | F_INC_EXC | Fecha de exclusión del caso |  | Fecha del cambio de estado Incluido/Excluido del paciente en el estudio. Formato dd/mm/aaaa |
| **Datos previos** | | | | |
| 4 | FNACIMIENTO | Fecha de nacimiento |  | Fecha de nacimiento del paciente. Formato dd/mm/aaaa |
| 5 | EDAD | Edad |  | Calculo automático de la edad en años cumplidos a partir de la fecha digitada para la variable anterior |
| 6 | SEXO | Sexo del paciente |  | Genero del paciente. Opciones: Femenino/Masculino |
| 7 | F_INGRESO | Fecha de ingreso en hospital |  | Fecha en que ingresa el paciente en el hospital por posible EPOC. Formato dd/mm/aaaa |
| 8 | FPRE_AUDIPOC | Fecha de inclusión provisional del paciente |  | Fecha del día en que se establece la potencial elegibilidad del paciente para el estudio e.EPOC. Formato dd/mm/aaaa |
| 9 | FUREPRE | El paciente ha sido reclutado a partir de... |  | Fuente de reclutamiento del paciente. Opciones: Listado de admisión/ Listado de códigos |
| 10 | CRIELEPOT_EPOC | EPOC o enfermedad pulmonar obstructiva crónica | EPOC o enfermedad pulmonar obstructiva crónica | Opciones: Si/No |
| 11 | CRIELEPOT_BOC | BOC o bronquitis obstructiva crónica | BOC o bronquitis obstructiva crónica | Opciones: Si/No |
| 12 | CRIELEPOT_BC | BC o bronquitis crónica | BC o bronquitis crónica | Opciones: Si/No |
| 13 | CRIELEPOT_OCFA | OCFA u obstrucción crónica al flujo aéreo | OCFA u obstrucción crónica al flujo aéreo | Opciones: Si/No |
| 14 | CRIELEPOT_LCFA | LCFA o limitación crónica al flujo aéreo | LCFA o limitación crónica al flujo aéreo | Opciones: Si/No |
| 15 | CRIELEPOT_NO | Neumopatía Obstructiva | Neumopatía Obstructiva | Opciones: Si/No |
| 16 | CRIELEPOT_BRONCAS | Bronquitis asmática | Bronquitis asmática con o sin referencias a agudización, exacerbación, infección, broncoespasmo, disnea | Opciones: Si/No |
| 17 | CRIELEPOT_INFRESP | Infección respiratoria | Infección respiratoria, excluida neumonía | Opciones: Si/No |
| 18 | CRIELEPOT_INFBRON | Infección bronquial | Infección bronquial | Opciones: Si/No |
| 19 | CRIELEPOT_INSURESP | Insuficiencia respiratoria crónica, aguda o agudizada | Insuficiencia respiratoria crónica, aguda o agudizada, si no va asociada a un diagnóstico causal otro que EPOC (o BOC, o BC, u OCFA, o LCFA) | Opciones: Si/No |
| 20 | CRIELEPOT_DISNEA | Disnea | Disnea a filiar, en estudio, o no filiada | Opciones: Si/No |
| 21 | CRIELEPOT_PATORESP | Patología respiratoria inespecífica | Patología respiratoria inespecífica en estudio o no filiada | Opciones: Si/No |
| 22 | CRIELEPOT_INSUCAR | Insuficiencia Cardiaca | Insuficiencia Cardiaca SI no se menciona de forma explícita el EAP y SI se acompaña de cualquier término descrito en las variables 10- 19 | Opciones: Si/No |
| 23 | SCA_1 | 491 (Bronquitis Crónica) | 491 (Bronquitis Crónica) | Opciones: Si/No |
| 24 | SCA_2 | 496 (EPOC) | 496 (EPOC) | Opciones: Si/No |
| 25 | SCA_3 | 518.84 (“insuficiencia respiratoria aguda sobre crónica”) | 518.84 (“insuficiencia respiratoria aguda sobre crónica”) | Opciones: Si/No |
| 26 | RESELO | Responsable equipo local | Investigador responsable y referente por Hospital o unidad sanitaria participante del estudio | Nombres y Apellidos |
| 27 | RESINF | Responsable recogida información del caso | Investigador, encuestador responsable del ingreso del caso en la base de datos | Nombres y Apellidos |
| 28 | IMPLICADO_RI | ¿Ha estado implicado el responsable de la recogida de la información en la asistencia clínica a este paciente en el ingreso actual? | ¿Ha estado implicado el responsable de la recogida de la información en la asistencia clínica a este paciente en el ingreso actual? | Opciones: Si, parcial (ingresado en mi área pero no bajo mis cuidados)/ Sí, total (bajo mis cuidados)/ No |
| 29 | INFO_AUDIPOC | En el ámbito donde se atendió al paciente, ¿Cree el responsable de la información que se tenía información de que AUDIPOC estaba en activo? | ¿Los profesionales responsables del cuidado del paciente estaban enterados que se estaba realizando el AUDIPOC en ese momento? | Opciones: Si, información difusa/ Si, información precisa /No |
| **Datos inclusión** | | | | |
| 1 | INCLUYE | ¿Se incluye definitivamente el caso? | Inclusión definitiva del caso. | Opciones: Si/No |
| 2 | CRIEDEF_1 | Otro diagnóstico específico | Otro diagnóstico específico, EN EL MOMENTO DEL INGRESO | Opciones: edema pulmonar/ neumonía, embolismo pulmonar/ neumotórax/ traumatismo costal o fracturas/ aspiración/ arritmia desencadenante (no la acompañante a la IRA)/ derrame pleural/ Otros. Permitir mas de una opción. |
| 2 | CRIEDEF_1.1 | Otro diagnóstico específico ¿Cual? | Por favor digite otro diagnóstico específico, EN EL MOMENTO DEL INGRESO, no incluido en las opciones anteriores | Campo para rellenar maximo 100 caracteres. Solo debe estar habilitado si se ha respondido a la pregunta anterior con la opción otros. |
| 3 | CRIEDEF_2 | Otra patología respiratoria asociada que condiciona el cuidado | Otra patología respiratoria asociada que condiciona el cuidado | Opciones: Fibrosis pulmonar u otra EPID/ cifoescoliosis u otra restricción toracógena/ SAOS confirmada sin tratamiento/ obesidad-hipoventilación/ patología neuromuscular/ estenosis de vía aérea superior/ bronquiectasias prominentes/ secuelas de TB/ Otra. Permitir mas de una opción. |
| 3 | CRIEDEF_2.1 | Otra patología respiratoria asociada que condiciona el cuidado ¿Cual? | Por favor digite otra patología RESPIRATORIA asociada que condiciona el cuidado, NO INCLUIDA en las opciones anteriores | Campo para rellenar maximo 100 caracteres. Solo debe estar habilitado si se ha respondido a la pregunta anterior con la opción otros. |
| 4 | CRIEDEF_3 | Otra patología de vía aérea | Otra patología de vía aérea | Opciones: Diagnóstico previo de asma (particularmente en no fumadores)/ bronquiectasias quísticas diseminadas/ bronquiolitis/ Otra |
| 4 |  | Otra patología de vía aérea ¿Cual? | Por favor digite otra patología DE VÍA AÉREA, NO INCLUIDA en las opciones anteriores | Campo para rellenar maximo 100 caracteres. Solo debe estar habilitado si se ha respondido a la pregunta anterior con la opción otros. |
| 5 | CRIEDEF_4 | Cardiopatía importante con insuficiencia cardiaca crónica | Cardiopatía importante con insuficiencia cardiaca crónica | Opciones: Si/No |
| 6 | CRIEDEF_5 | Carcinoma broncogénico u otra neoplasia torácica no controlada | Carcinoma broncogénico u otra neoplasia torácica no controlada | Opciones: Si/No |
| 7 | CRIEDEF_6 | Patología extrapulmonar que condiciona el cuidado | Patología extrapulmonar que condiciona el cuidado | Opciones: demencia evolucionada/ neoplasia extendida/ insuficiencia hepática terminal/ insuficiencia renal terminal/ insuficiencia cardiaca/otras situaciones a juicio del investigador |
|  |  | Otra patología extrapulmonar que condiciona el cuidado | Por favor digite otra patología EXTRAPULMONAR que condiciona el cuidado, NO INCLUIDA en las opciones anteriores | Campo para rellenar máximo 100 caracteres. Solo debe estar habilitado si se ha respondido a la pregunta anterior con la opción otros. |
| 8 | FA_EXC | Fecha de alta | Fecha de alta, para los casos provisionalmente ingresados que se han excluido | Fecha de alta. Formato dd/mm/aaaa. Deberá estar habilitada solo si se ha excluido el paciente |
| **Validación de criterios de inclusión.** Debe estar deshabilitada si el caso es excluido. Para la validación debe responder SI al criterio 1, o escoger cualquiera de las opciones del criterio 2 + cualquiera de las opciones del criterio 3. | | | | |
| 1 | CRIIDEF_1 | Ingresado por diagnóstico principal de eEPOC | Ingresado por diagnóstico principal de eEPOC | Opciones: Si/No. |
| 2 | CRIIDEF_2 | Ingresado por patología respiratoria | Ingresado por patología respiratoria | Opciones: Infección respiratoria sin infiltrado radiológico ni derrame pleural/ insuficiencia respiratoria / Insuficiencia cardiaca derecha/ Bronquitis/ broncoespasmo |
| 3 | CRIIDEF_3 | Diagnostico historico de EPOC u obstrucción de la via aérea | Diagnóstico histórico de EPOC o se documenta una FEV1/FVC<0,70 en ausencia de otra enfermedad obstructiva como asma o bronquiolitis | Opciones: Diagnóstico histórico de EPOC - FEV1/FVC<0,70 |
| 4 | FA_EXC | Fecha de alta | Fecha de alta, para los casos provisionalmente ingresados que se han excluido | Fecha de alta. Formato dd/mm/aaaa. Deberá estar habilitada solo si NO SE CUMPLE la formula de validación de los criterios de inclusión anterior. Este caso se considerará entonces excluido |
| **Datos generales:** Deshabilitado en caso que el caso sea previamente excluido | | | | |
| 1 | F_INGRESO | Fecha de ingreso en hospital | Fecha de ingreso en hospital | Fecha en que ingresa el paciente en el hospital por posible EPOC. Formato dd/mm/aaaa. Para los casos ingresados que han validado los criterios de inclusión. Debe aparecer automaticamente porque se ha diligenciado antes en la variable 7 de Datos generales |
| 2 | PROCEPA | Procedencia del paciente | Lugar de procedencia | Opciones: Domicilio/ Residencia/ Centro sociosanitario/ Otro hospital/ Otro |
| 2 | OHPROCEPA | ¿De qué otro hospital procede el paciente? | Por favor digite el nombre del OTRO HOSPITAL de procedencia del paciente. | Campo para rellenar máximo 100 caracteres. Solo debe estar habilitado si se ha respondido a la pregunta 2 de esta sección con la opción Otro hospital. |
| 2 | OSPROCEPA | ¿De qué otro sitio procede el paciente? | Por favor digite el otro lugar de procedencia del paciente, NO INCLUIDO en las opciones anteriores | Campo para rellenar maximo 100 caracteres. Solo debe estar habilitado si se ha respondido a la pregunta 2 de esta sección con la opción Otro. |
| 3 | VEH | Via de entrada al hospital | ¿Cuál es la via de ingreso del paciente en el hospital? | Opciones: Urgencias/ Consulta Externa/ Programa de atención domiciliaria/ Otra. |
| 3 | OVEH | Otra via de entrada al hospital ¿Cual? | Por favor digite la OTRA via de entrada del paciente al Hospital | Campo para rellenar maximo 100 caracteres. Solo debe estar habilitado si se ha respondido a la pregunta 3 de esta sección con la opción Otra. |
| 4 | LDI | Lugar de ingreso | Servicio donde ingresa el paciente. | Opciones: Planta Neumología/ Planta M Interna/ Periférico de Neumología/ Periférico de M Interna/ Geriatría/ Otro. |
| 4 | OLI | Otro lugar de ingreso | Por favor digite el OTRO SERVICIO de ingreso del paciente, NO INCLUIDO en las opciones anteriores | Campo para rellenar maximo 100 caracteres. Solo debe estar habilitado si se ha respondido a la pregunta 4 de esta sección con la opción Otro. |
| 5 | UCI | ¿Ha sido atendido el paciente durante el actual ingreso en una Unidad de Cuidados Intensivos (UCI o Intermedios)? | ¿Ha sido atendido el paciente durante el actual ingreso en una Unidad de Cuidados Intensivos (UCI o Intermedios)? Campo obligatorio. | Opciones: No/ UCI general/ UCI Neumología/ Cuidados Intermedios Generales/ Cuidados Intermedios Neumológicos. |
| 6 | FINGUCI | Fecha de ingreso en UCI | Fecha de ingreso en UCI. | Fecha de ingreso en UCI. Formato dd/mm/aaaa. Debe estar deshabilitada si la respuesta a la pregunta 5 de esta sección es NO |
| 7 | PROCUCI | De dónde procede el paciente que ingresa en UCI | Servicio o Unidad de donde procede el paciente que ingresa en UCI. | Opciones: Urgencias/ Planta Neumología/ Planta M Interna/ Periférico de Neumología/ Otro. Debe estar deshabilitada si la respuesta a la pregunta 5 de esta sección es NO |
| 7 | OLP | Otro lugar de procedencia del paciente | Por favor digite el OTRO SERVICIO donde ha ingresado el paciente. | Campo para rellenar maximo 100 caracteres. Solo debe estar habilitado si se ha respondido a la pregunta 7 de esta sección con la opción Otro. |
| 8 | FALTUCI | Fecha de alta en UCI | Fecha de alta en UCI. | Fecha de alta en UCI.Formato dd/mm/aaaa. Debe estar deshabilitada si la respuesta a la pregunta 5 de esta sección es NO. No debe ser inferior a la fecha digitada para la pregunta 6 de esta sección. |
| 9 | DUCI | Destino del paciente tras ser dado de alta en UCI | Servicio al que se traslada el paciente tras ser dado de alta en UCI. | Opciones: Planta Neumología/ Planta M Interna/ Periférico de Neumología/ Periférico de M Interna/ Otro. Cálculo automático. |
| 9 | OLT | Otro lugar de destino al alta | Por favor digite OTRO SERVICIO DE DESTINO al alta de UCI. | Campo para rellenar maximo 100 caracteres. Solo debe estar habilitado si se ha respondido a la pregunta 9 de esta sección con la opción Otro. |
| 10 | DINGUCI | Duración ingreso en UCI | Duración ingreso en UCI. | Cálculo automático a partir de la respuesta a las preguntas 6 y 8 de esta sección. Debe estar deshabilitada si la respuesta a la pregunta 5 de esta sección es NO. |
| 11 | EXITUS | Fallecimiento del paciente el periodo de ingreso | Fallecimiento del paciente durante todo el periodo de ingreso. | Opciones: Si/ No |
| 11 | FM | Fecha de muerte | Fecha de muerte. | Fecha de muerte. Formato dd/mm/aaaa. Solo debe estar habilitada si la respuesta a la pregunta 11 de esta sección es SI. |
| 12 | FA | Fecha de alta | Fecha de alta. | Fecha de alta. Formato dd/mm/aaaa. En caso de haber diligenciado fecha de muerte, este valor debe coincidir con la fecha de alta y aparecer de forma automática |
| 13 | DURING | Duración del ingreso | Duración del ingreso. Fecha de alta o de fallecimiento menos fecha de ingreso. | Calculo automático a partir de la respuesta a las preguntas 1 y 13 |
| 14 | DALTA | Destino al alta | Destino al alta. | Opciones: Domicilio/ Hospital/ Centro Sociosanitario/ Residencia/ Hospitalización Domiciliaria/ Otro. |
| 15 | CIAS | CIAS médico AP | CIAS del médico de Atención Primaria. | Campo para rellenar maximo 50 caracteres. |
| 16 | OTRODOM | Traslado a otro domicilio distinto al propio | Traslado a otro domicilio distinto al propio. | Opciones: Si/ No. Solo debe habilitarse si se responde a la pregunta14 con la opción Domicilio |
| 17 | NHA | Nombre del hospital de destino al alta | Nombre del hospital al que se traslada el paciente. | Campo para rellenar maximo 100 caracteres. Solo desde habilitarse si se responde a la pregunta14 con la opción Hospital. |
| 18 | DHA | Dirección del hospital | Dirección del hospital al que se traslada el paciente. Campo de texto libre de 100 caracteres. Campo no obligatorio. | Campo para rellenar maximo 100 caracteres. Solo desde habilitarse si se responde a la pregunta14 con la opción Hospital. |
| 19 | THA | Teléfono del hospital | Teléfono del hospital al que se traslada el paciente. Campo no obligatorio. | Campo para rellenar maximo 100 caracteres. Solo desde habilitarse si se responde a la pregunta14 con la opción Hospital. |
| 20 | CESA | Centro de Salud Asignado | Centro de Salud asignado al paciente. | Campo para rellenar maximo 100 caracteres. |
| 21 | NCSS | Nombre Centro Sociosanitario | Nombre del Centro Sociosanitario al que se traslada el paciente. | Campo para rellenar maximo 100 caracteres.Solo desde habilitarse si se responde a la pregunta14 con la opción Centro sociosanitario. |
| 22 | DCSS | Dirección Centro Sociosanitario | Dirección del Centro Sociosanitario al que se traslada el paciente. | Campo para rellenar maximo 100 caracteres.Solo desde habilitarse si se responde a la pregunta14 con la opción Centro sociosanitario. |
| 23 | TCSS | Teléfono Centro Sociosanitario | Teléfono de contacto Centro Sociosanitario. | Campo para rellenar maximo 100 caracteres.Solo desde habilitarse si se responde a la pregunta14 con la opción Centro sociosanitario. |
| 24 | NRE | Nombre Residencia | Nombre Residencia a la que se traslada el paciente. | Campo para rellenar maximo 100 caracteres.Solo desde habilitarse si se responde a la pregunta14 con la opción Residencia. |
| 25 | DRE | Dirección Residencia | Dirección Residencia a la que se traslada el paciente. | Campo para rellenar maximo 100 caracteres.Solo desde habilitarse si se responde a la pregunta14 con la opción Residencia. |
| 26 | TRE | Teléfono contacto residencia | Teléfono de contacto de la residencia. | Campo para rellenar maximo 100 caracteres.Solo desde habilitarse si se responde a la pregunta14 con la opción Residencia. |
| 27 | ODE | ¿Qué otro destino? | Por favor digite OTRO destino al alta, NO INCLUIDO en las opciones anteriores | Campo para rellenar maximo 100 caracteres. Solo debe estar habilitada si la respuesta a la pregunta 14 de esta sección es Otro. |
| **Datos clínicos - Al ingreso** Habilitado solo para casos incluidos | | | | |
| **Datos clínicos - Al ingreso: Interrogatorio Clínico** | | | | |
| 1 | PIEEPOC | ¿Es el actual el primer ingreso por eEPOC? | Especificar si el ingreso objeto de estudio (ingreso index) es el primero por eEPOC. Campo no obligatorio | Opciones: Si/ No |
| 2 | NIU2M | Número de ingresos por eEPOC en los últimos doce meses | Número de ingresos por exacerbaciones de EPOC en los últimos doce meses. | Valor positivo entre 0- 13 |
| 3 | FPREEPOC | Fecha del ingreso por exacerbación EPOC previo al actual | Fecha del ingreso por exacerbación EPOC previo al actual. | Fecha del ingreso por exacerbación EPOC previo al actual. Formato dd/mm/aaaa |
| 4 | NV | Número de visitas a urgencias por EPOC en los últimos 12 meses, con o sin ingreso hospitalario | Número de visitas a urgencias por EPOC en los últimos 12 meses, con o sin ingreso hospitalario. | Valor positivo entre 0- 24 |
| **Datos clínicos - Al ingreso: Interrogatorio Clínico: Índice de Charlson (IC)** | | | | |
| 5 | ICHARSIDA | SIDA | SIDA | Opciones: Si/ No |
| 6 | ICHARECV | Enfermedad cerebro vascular | Enfermedad cerebro vascular | Opciones: Si/ No |
| 7 | ICHAREPOC | Enfermedad pulmonar crónica | Enfermedad pulmonar crónica | Opciones: Si/ No |
| 8 | ICHARICC | Insuficiencia cardiaca congestiva | Insuficiencia cardiaca congestiva | Opciones: Si/ No |
| 9 | ICHARETC | Enfermedad tejido conectivo | Enfermedad tejido conectivo | Opciones: Si/ No |
| 10 | ICHARDEM | Demencia | Demencia | Opciones: Si/ No |
| 11 | ICHARHEM | Hemiplejia | Hemiplejia | Opciones: Si/ No |
| 12 | ICHARLEUCEM | Leucemia | Hemiplejia | Opciones: Si/ No |
| 13 | ICHARLIN | Linfoma | Linfoma | Opciones: Si/ No |
| 14 | ICHARIM | Infarto de miocardio | Infarto de miocardio | Opciones: Si/ No |
| 15 | ICHAREVP | Enfermedad vascular periférica | Enfermedad vascular periférica | Opciones: Si/ No |
| 16 | ICHARUGD | Úlcera gastro-duodenal | Úlcera gastro-duodenal | Opciones: Si/ No |
| 17 | ICHARDM | Diabetes Mellitus | Diabetes Mellitus | Opciones: Si/ Sin daño visceral/ Con daño visceral/ No |
| 18 | ICHARHEP | Hepatopatía | Hepatopatía | Opciones: Si/ Media/ Moderada/ Severa/ No |
| 19 | ICHARNEF | Nefropatía | Nefropatía | Opciones: Si/ Media/ Moderada/ Severa/ No |
| 20 | ICHARTS | Tumor sólido | Tumor sólido | Opciones: Si/ No metástasico/ Metástasico/ No |
| 21 | ICHARNCOMOR | Nº de condiciones comórbidas | Número de condiciones comórbidas. | Número de condiciones comórbidas. Cálculo automático a partir del numero de respuestas SI a las preguntas 5- 20 de esta sección |
| 22 | ICHARICHAR | Indice de Charlson (IC) | Indice de Charlson (IC). Cálculo automático. | Indice de Charlson (IC). Cálculo automático. |
| 23 |  | Edad | Edad del paciente en años | Calculo automático de la edad en años cumplidos a partir de la fecha digitada en la variable 4 de datos generales. |
| 24 | ICHAREDAD | IC ajustado por edad |  | IC ajustado por edad. Cálculo automático. |
| **Datos clínicos - Al ingreso: Interrogatorio Clínico** | | | | |
| 25 | COMOR | Comorbilidad clínicamente relevante | Comorbilidad clínicamente relevante. | Opciones: Si/ No |
| 26 | CS | Circustancias sociales | Circustancias sociales. | Opciones: Vive solo/ Vive acompañado |
| 27 | SS | Soporte social | Soporte social. | Opciones: En su domicilio sin asistencia social/ En su domicilio con asistencia social/ Residencia asistida de día/ Residencia asistida de 24 horas |
| 28 | HT | Tabaquismo | Tabaquismo. | Opciones: Fumador actual/ Exfumador reciente (<= 3 meses)/ Exfumador (> 3 meses)/ No fumador |
| 55 | PF | Cigarrillos/día | Numeros de cigarrillo consumidos habitualmente en 24 horas | Valor positivo entre 0- 100. Debe estar deshabilitada en caso de responder a la pregunta anterior con la opción No Fumador |
| 55 | PFD | Duración del hábito (años) | Duración del hábito (años). | Valor positivo entre 0- 100. Debe estar deshabilitada en caso de responder a la pregunta anterior con la opción No Fumador |
| 55 | PFP | Paquetes-año | Paquetes-año. | Valor positivo calculo automatico. Debe estar deshabilitada en caso de responder a la pregunta anterior con la opción No Fumador |
| 56 | HAI | Enolismo | Enolismo | Opciones: Sí (>80gr. día)/ No |
| 57 | ID | Incremento de disnea sobre basal | Información documentada de incremento de disnea sobre basal. | Opciones: Si/ No |
| 58 | IE | Incremento de volumen de esputo sobre basal | Información documentada de incremento de volumen de esputo sobre basal. Campo obligatorio. | Opciones: Si/ No |
| 59 | CE | Cambios en el color del esputo | Información documentada sobre cambios en el color del esputo. Campo obligatorio. | Opciones: Si/ No |
| 60 | PUE | Cambios en el color a amarillo o verde | Información documentada sobre cambios en el color a amarillo o verde. Campo obligatorio. | Opciones: Si/ No |
| **Datos clínicos - Al ingreso** | | | | |
| 61 | PPKG | Peso | Peso del paciente en kg | Valor positivo entre 40 y 200. Puede ser tomado de datos previos obtenidos por ejemplo durante una espirometría.En todo caso el más reciente tomado dentro del último año. |
| 62 | ALP | Talla | Altura en metros | Recoger el dato más reciente tomado dentro del último año. Valor positivo entre 1,0 y 2,0. |
| 63 | IMC | Índice de Masa Corporal (IMC) | Índice de Masa Corporal (IMC) | Campo calculado automáticamente. |
| 64 | FRE | Frecuencia respiratoria | Número de respiraciones en un minuto (rpm) | Valor positivo entre 10 y 50. |
| 65 | FCA | Frecuencia cardiaca | Número de pulsaciones o latidos por minuto (ppm) | Valor positivo entre 40 y 200. |
| 66 | TARS | Tensión arterial sistólica | Valor del nivel de presión arterial máxima durante la sístole | Valor positivo entre 40 y 250. |
| 67 | TARD | Tensión arterial diastólica | Valor del nivel de presión arterial máxima durante la diástole | Valor positivo entre 0 y 200. |
| 68 | TURA | Temperatura (ºC) | Temperatura corporal en grados centigrados | Valor positivo entre 34,9 y 40,9. |
| 69 | EP | Edemas maleolares. | Edemas maleolares, identificado en cualquier momento del ingreso | Opciones: Si /No |
| 70 | PS | Performance Status | Nivel de desempeño o funcionamiento del paciente en las actividades de la vida diaria: Autonomia y Autocuidado | Opciones: Actividad normal sin limitación/ Limitado para actividades vigorosas/ Limitado para actividades de la vida diaria,conserva autocuidado/ Autocuidado limitado/ Postrado en silla o cama/ Incapacidad para autocuidado |
| **Datos clínicos - Al ingreso: Tratamiento: Tratamiento en los siete días previos** | | | | |
| 71 | TTO7 | Tratamiento en los siete días previos al ingreso | Tratamiento documentado en los siete días previos al ingreso. | Opciones: Si /No |
| 72 | TTO7FISIOTERAPIA | Fisioterapia | Fisioterapia en los 7 dias previos al ingreso. | Opciones: Si /No. Debe estar deshabilitada en caso de responder con la opción NO a la pregunta 71 de esta sección |
| 73 | TTO7OXIGENO | Oxígeno | Oxígeno en los 7 dias previos al ingreso. | Opciones: Si /No. Debe estar deshabilitada en caso de responder con la opción NO a la pregunta 71 de esta sección |
| 74 | TTO7MACROLIDOS | Macrólidos | Macrólidos en los 7 dias previos al ingreso. | Opciones: Si /No. Debe estar deshabilitada en caso de responder con la opción NO a la pregunta 71 de esta sección |
| 75 | TTO7AMOXICILINA | Amoxicilina | Amoxicilina en los 7 dias previos al ingreso. | Opciones: Si /No. Debe estar deshabilitada en caso de responder con la opción NO a la pregunta 71 de esta sección |
| 76 | TTO7AMOXICILINACLAV | Amoxicilina Clavulánico | Amoxicilina Clavulánico en los 7 dias previos al ingreso. | Opciones: Si /No. Debe estar deshabilitada en caso de responder con la opción NO a la pregunta 71 de esta sección |
| 77 | TTO7CEFALOSPORINAS | Cefalosporinas | Cefalosporinas en los 7 dias previos al ingreso. | Opciones: Si /No. Debe estar deshabilitada en caso de responder con la opción NO a la pregunta 71 de esta sección |
| 78 | TTO7QUINOLONAS | Quinolonas | Quinolonas en los 7 dias previos al ingreso. | Opciones: Si /No. Debe estar deshabilitada en caso de responder con la opción NO a la pregunta 71 de esta sección |
| 79 | TTO7AGCORTA | Corta duración | Se emplearon medicamentos de Corta duración en los 7 dias previos al ingreso. | Opciones: Si /No. Debe estar deshabilitada en caso de responder con la opción NO a la pregunta 71 de esta sección |
| 80 | TTO7AGLARGA | Larga duración en dispensación única | Se emplearon medicamentos de Larga duración en dispensación única en los 7 dias previos al ingreso. | Opciones: Si /No. Debe estar deshabilitada en caso de responder con la opción NO a la pregunta 71 de esta sección |
| 81 | TTO7BROIPR | Bromuro de Ipratropio | Bromuro de Ipratropio en los 7 dias previos al ingreso. | Opciones: Si /No. Debe estar deshabilitada en caso de responder con la opción NO a la pregunta 71 de esta sección |
| 82 | TTO7BROTIO | Bromuro de Tiotropio | Bromuro de Tiotropio en los 7 dias previos al ingreso. | Opciones: Si /No. Debe estar deshabilitada en caso de responder con la opción NO a la pregunta 71 de esta sección |
| 83 | TTO7METILXANTINAS | Metilxantinas | Metilxantinas (Teofilina u otras) en los 7 dias previos al ingreso. | Opciones: Si /No. Debe estar deshabilitada en caso de responder con la opción NO a la pregunta 71 de esta sección |
| 84 | TTO7INTRAVENOSOS | Intravenoso | Requirio administración Intravenosa de medicamentos en los 7 dias previos al ingreso. | Opciones: Si /No. Debe estar deshabilitada en caso de responder con la opción NO a la pregunta 71 de esta sección |
| 85 | TTO7ORALES | Oral | Requirio administración Oral de mediciamentos en los 7 dias previos al ingreso | Opciones: Si /No. Debe estar deshabilitada en caso de responder con la opción NO a la pregunta 71 de esta sección |
| 86 | TTO7INHALADOS | Inhalados en dispensación única | Inhalados en dispensación única en los 7 dias previos al ingreso. | Opciones: Si /No. Debe estar deshabilitada en caso de responder con la opción NO a la pregunta 71 de esta sección |
| 87 | TTO7FLUTICASONA | Fluticasona-Salmeterol | Fluticasona-Salmeterol en los 7 dias previos al ingreso. | Opciones: Si /No. Debe estar deshabilitada en caso de responder con la opción NO a la pregunta 71 de esta sección |
| 88 | TTO7BUDESONIDA | Budesonida-Formeterol | Budesonida-Formeterol en los 7 dias previos al ingreso. | Opciones: Si /No. Debe estar deshabilitada en caso de responder con la opción NO a la pregunta 71 de esta sección |
| 89 | TTO7ANTIOXIDANTES | Antioxidantes (N-Acetilcisteina) u otros mucolíticos | Antioxidantes (N-Acetilcisteina) u otros mucolíticos en los 7 dias previos al ingreso. | Opciones: Si /No. Debe estar deshabilitada en caso de responder con la opción NO a la pregunta 71 de esta sección |
| 90 | TTO7ANTITUSIVOS | Antitusivos | Antitusivos en los 7 dias previos al ingreso. | Opciones: Si /No. Debe estar deshabilitada en caso de responder con la opción NO a la pregunta 71 de esta sección |
| 91 | TTO7ESTIMULANTES | Estimulantes respiratorios | Estimulantes respiratorios (Bismesilato de Almitrina) en los 7 dias previos al ingreso. | Opciones: Si /No. Debe estar deshabilitada en caso de responder con la opción NO a la pregunta 71 de esta sección |
| 92 | TTO7VENTILACION | Ventilación mecánica no invasiva | Ventilación mecánica no invasiva en los 7 dias previos al ingreso. | Opciones: Si /No. Debe estar deshabilitada en caso de responder con la opción NO a la pregunta 71 de esta sección |
| **Datos clínicos - Al ingreso: Pruebas Respiratorias** | | | | |
| 93 | F_INGRESO | Fecha de ingreso en hospital | Fecha en que ingresa el paciente en el hospital por posible EPOC. | Formato dd/mm/aaaa. Prediligenciada en forma automática de la respuesta a la pregunta 1 de la sección de datos generales |
| 94 | EMR | ¿Tiene espirometría previa al ingreso actual? | ¿Tiene espirometría previa al ingreso actual?. | Opciones: Si/ No |
| 95 | FEMR | Fecha espirometría más reciente anterior al actual ingreso | Fecha de la espirometría más reciente anterior al actual ingreso. | Formato dd/mm/aaaa. No debe ser posterior a la fecha de ingreso del paciente |
| **Datos clínicos - Al ingreso: Pruebas Respiratorias: Espirometría previa al ingreso actual** | | | | |
| 96 | E1FVC | FVC (mL) | Capacidad vital forzada medida en mL | FVC en ml. Valor positivo entre 800 y 3.600. Habilitada solo si la respuesta a la pregunta 94 de esta sección es SI |
| 97 | E1FVCP | FVC (% del teórico) | Capacidad vital forzada en % del estimado teórico | FVC espirometría en % del teórico. Valor positivo entre 30,0 y 150,0. Habilitada solo si la respuesta a la pregunta 94 de esta sección es SI |
| 98 | E1FEV1 | FEV1 (mL) | Volumen de espiración forzada en 1 minuto en mL | FEV1 espirometría en mL. Valor positivo entre 300 y 2.500. Habilitada solo si la respuesta a la pregunta 94 de esta sección es SI |
| 99 | E1FEV1P | FEV1 (% del teórico) | Volumen de espiración forzada en 1 minuto en % del estimado teórico | FEV1 espirometría en % del teórico. Valor positivo entre 20,0 y 150,0. Habilitada solo si la respuesta a la pregunta 94 de esta sección es SI |
| 100 | E1FEVCVF | FEV1/CVF (% real) | Cociente entre FEV1 y la CVF en % del real | FEV1/CVF en % del real. Campo calculado. Formula (Valor pregunta 98/ Valor pregunta 96)x 100. Habilitada solo si la respuesta a la pregunta 94 de esta sección es SI |
| **Datos clínicos - Durante el ingreso** Habilitado solo para casos incluidos | | | | |
| **Datos clínicos - Durante el ingreso: Parte I** | | | | |
| 1 | GI | Gasometría al ingreso en urgencias | Gasometría al ingreso en urgencias. | Opciones: Si/ No. |
| 2 | FIO2I | FIO2 | Fracción inspirada de oxigeno en gas inspirado, expresado en %. Tomar el primer valor obtenido del paciente: de la ambulancia, de la hoja de enfermería. | Campo para relleñar. Valor positivo entre 21 y 100. Si el paciente no requiere de oxigeno suplementario, se considera una FIO2 del 21% |
| **Datos clínicos - Durante el ingreso: Parte I: Gasometría al ingreso en urgencias** | | | | |
| 3 | G1PH | pH | Valor de PH en sangre arterial | Valor positivo entre 7,00 y 7,60. Solo se habilita si la respuesta a la pregunta 1 de esta sección es SI. |
| 4 | G1PO2 | PO2 | Presión arterial de O2 en mmHg | Valor positivo entre 30 y 100. Solo se habilita si la respuesta a la pregunta 1 de esta sección es SI. |
| 5 | G1SO2 | SaO2 | Saturación arterial de O2 en % | Valor positivo entre 60 y 100. Solo se habilita si la respuesta a la pregunta 1 de esta sección es SI. |
| 6 | G1PCO2 | PCO2 | Presión arterial de CO2 en mmHg | Valor positivo entre 30 y 150. Solo se habilita si la respuesta a la pregunta 1 de esta sección es SI. |
| 7 | G1BIC | Bicarbonato | Valor de Bicarbonato o HCO3- en mEq | Valor positivo entre 15 y 40. Solo se habilita si la respuesta a la pregunta 1 de esta sección es SI. |
| **Datos clínicos - Durante el ingreso: Parte I: Hemograma y bioquímica** | | | | |
| 8 | H1HB | Hemoglobina | Nivel de hemoglobina (Hb) en g/dL | Valor positivo entre 8,0 y 20,0. Si existe más de un resultado recoger el primero. |
| 9 | H1HCT | Hematocrito | Nivel de hematocrito (HCT) en % | Valor positivo entre 24,0 y 70,0. Si existe más de un resultado recoger el primero. |
| 10 | H1LEUCO | Leucocitos | Unidades totales/dL | Valor positivo entre 4.000 y 30.000. Si existe más de un resultado recoger el primero. |
| 11 | H1NEU | Neutrófilos | Proporción de Neutrofilos en sangre expresada en % | Valor positivo expresado en % entre 10 y 90. Si existe más de un resultado recoger el primero. |
| 12 | H1NAS | Sodio sérico | Nivel de Sodio en sangre en mEq/L | Valor positivo entre 125 y 150. Si existe más de un resultado recoger el primero. |
| 13 | H1POS | Potasio sérico | Nivel de Potásio en sangre en mEq/L | Valor positivo entre 3,0 y 6,0. Si existe más de un resultado recoger el primero. |
| 14 | H1NSA | Nivel sérico de albúmina | Nivel de albumina en sangre en mg/dL | Valor positivo 20 y 50. Si existe más de un resultado recoger el primero. |
| 15 | H1NSU | Nivel sérico de urea | Nivel de urea en sangre en mg/dL | Valor positivo entre 10 y 90. Si existe más de un resultado recoger el primero. |
| 16 | H1NSC | Nivel sérico de creatinina | Nivel de creatinina en sangre en mg/dL | Valor positivo entre 0,5 y 3,0. Si existe más de un resultado recoger el primero. |
| **Datos clínicos - Durante el ingreso: Parte I** | | | | |
| 17 | RXT | Rx. Torax en las primeras 24 horas | ¿Se ha hecho un Rx de torax a este paciente en las primeras 24 horas? | Opciones Si/ No |
| **Datos clínicos - Durante el ingreso: Parte II** | | | | |
| 18 | OTE | Oxigenoterapia durante el ingreso | Oxigenoterapia durante el ingreso. Escoger el procedimiento empleado luego de la estabilización inicial con FiO2 más alta. | Opciones: Pinzas nasales/ VentiMask/ Ventilación Mecánica No Invasiva/ No requirio oxigenoterapia |
| 19 | SO2 | Pulsoximetría | ¿Hubo control de saturación de O2 (mediante pulsoximetría) para ajustar la oxigenoterapia ? | Opciones Si/ No |
| 20 | T2FISIOTERAPIA | Fisioterapia | Fisioterapia. | Opciones Si/ No |
| **Datos clínicos - Durante el ingreso: Parte II: Tratamiento durante el ingreso** | | | | |
| 21 | T2OXIGENO | Oxígeno | ¿Ha recibido Oxigeno DURANTE EL INGRESO?. | Opciones: Si/ No. Debe aparecer respuesta automática a partir de la respuesta a la pregunta 18 de esta sección. (No: para la opción no requirio oxigenoterapia, Si: para el resto de las opciones) |
| 22 | T2MACROLIDOS | Macrólidos | ¿Ha recibido Macrólidos DURANTE EL INGRESO?. | Opciones: Si/ No |
| 23 | T2AMOXICILINA | Amoxicilina | ¿Ha recibido Amoxicilina DURANTE EL INGRESO?. | Opciones: Si/ No |
| 24 | T2AMOXICILINACLAV | Amoxicilina Clavulánico | ¿Ha recibido Amoxicilina Clavulánico DURANTE EL INGRESO?. | Opciones: Si/ No |
| 25 | T2CEFALOSPORINAS | Cefalosporinas | ¿Ha recibido Cefalosporinas DURANTE EL INGRESO?. | Opciones: Si/ No |
| 26 | T2QUINOLONAS | Quinolonas | ¿Ha recibido Quinilonas DURANTE EL INGRESO?. | Opciones: Si/ No |
| 27 | T2AGCORTA | Corta duración | Se emplearon medicamentos de Corta duración DURANTE EL INGRESO. | Opciones: Si/ No |
| 28 | T2AGLARGA | Larga duración en dispensación única | Se emplearon medicamentos de Larga duración en dispensación única DURANTE EL INGRESO. | Opciones: Si/ No |
| 29 | T2BROIPR | Bromuro de Ipratropio | ¿Ha recibido Bromuro de Ipratropio DURANTE EL INGRESO?. | Opciones: Si/ No |
| 30 | T2BROTIO | Bromuro de Tiotropio | ¿Ha recibido Bromuro deTiotropio DURANTE EL INGRESO?. | Opciones: Si/ No |
| 31 | T2METILXANTINAS | Metilxantinas | ¿Ha recibido Metilxantinas (Teofilina u otras) DURANTE EL INGRESO?. | Opciones: Si/ No |
| 32 | T2INTRAVENOSOS | Intravenosos | ¿Ha requerido de la administración Intravenosa de medicamentos DURANTE EL INGRESO? | Opciones: Si/ No |
| 33 | T2ORALES | Orales | ¿Ha requerido de la administración ORAL de medicamentos DURANTE EL INGRESO? | Opciones: Si/ No |
| 34 | T2INHALADOS | Inhalados en dispensación única | ¿Ha recibido Inhalados en dispensación única DURANTE EL INGRESO?. | Opciones: Si/ No |
| 35 | T2FLUTICASONA | Fluticasona-Salmeterol | ¿Ha recibido Fluticasona-Salmeterol DURANTE EL INGRESO?. | Opciones: Si/ No |
| 36 | T2BUDESONIDA | Budesonida-Formeterol | ¿Ha recibido Budesonida-Formeterol DURANTE EL INGRESO?. | Opciones: Si/ No |
| 37 | T2ANTIOXIDANTES | Antioxidantes (N-Acetilcisteina) u otros mucolíticos | ¿Ha recibido Antioxidantes (N-Acetilcisteina) u otros mucolíticos DURANTE EL INGRESO?. | Opciones: Si/ No |
| 38 | T2ANTITUSIVOS | Antitusivos | ¿Ha recibido Antitusivos DURANTE EL INGRESO?. | Opciones: Si/ No |
| 39 | T2ESTIMULANTES | Estimulantes respiratorios | ¿Ha recibido Estimulantes respiratorios (Bismesilato de Almitrina) DURANTE EL INGRESO?. | Opciones: Si/ No |
| **Datos clínicos - Durante el ingreso: Parte III** | | | | |
| 40 | PH735 | ¿Ha tenido un pH menor de 7,35 en cualquier momento del ingreso? | ¿Ha tenido un pH menor de 7,35 en cualquier momento del ingreso? | Opciones: Si/ No |
| 41 | PHG | ¿Se realizó una gasometría dentro de las 12 horas siguientes a la detección de la acidosis? | ¿Se realizó una gasometría dentro de las 12 horas siguientes a la detección de la acidosis? | Opciones: Si/ No |
| 42 | OTE2 | ¿Estaba con oxigenoterapia? | ¿Estaba con oxigenoterapia? | Opciones: Si/ No |
| 43 | FIO2 | FIO2 | Información sobre la fracción de oxigeno (%) en gas inspirado durante el ingreso, luego del tratamiento y estabilización clinica inicial. | Campo para relleñar. Valor positivo entre 21 y 100. Si el paciente no requiere de oxigeno suplementario, se considera una FIO2 del 21% |
| **Datos clínicos - Durante el ingreso: Parte III: Gasometría secundaria a ph<7,35** | | | | |
| 44 | G2PH | pH | Valor de PH en gasometria de control, posterior a gasometria con PH< 7,35 | Valor positivo entre 7,00 y 7,60. Habilitada solo si se ha respondido a la pregunta 40 de esta seccion con la opción SI |
| 45 | G2PO2 | PO2 | Valor de Presión arterial de O2 en mmHg, de gasometria de control, posterior a gasometria con PH< 7,35 | Valor positivo entre 30 y 100. Habilitada solo si se ha respondido a la pregunta 40 de esta seccion con la opción SI |
| 46 | G2SO2 | SaO2 | Valor de saturación arterial de O2 en % de gasometria de control, posterior a gasometria con PH< 7,35 | Valor positivo entre 60 y 100. Habilitada solo si se ha respondido a la pregunta 40 de esta seccion con la opción SI |
| 47 | G2PCO2 | PCO2 | Valor de Presión arterial de CO2 en mmHg de gasometria de control, posterior a gasometria con PH< 7,35 | Valor positivo entre 30 y 150. Habilitada solo si se ha respondido a la pregunta 40 de esta seccion con la opción SI |
| 48 | G2BIC | Bicarbonato | Valor de bicarbonato o HCO3- en mEq de gasometria de control, posterior a gasometria con PH< 7,35 | Valor positivo entre 15 y 40. Habilitada solo si se ha respondido a la pregunta 40 de esta seccion con la opción SI |
| **Datos clínicos - Durante el ingreso: Parte III** | | | | |
| 49 | SV | ¿Recibió soporte ventilatorio en cualquier momento del ingreso? | ¿Recibió soporte ventilatorio en cualquier momento del ingreso? | Opciones: Si/ No |
| 50 | LSV | Lugar del soporte ventilatorio | Unidad o Servicio donde se ha implantado el soporte ventilatorio. | Opciones: UCI General/ UCI Neumología/ Intermedios General/ Intermedios Neumología/ Sala Neumología/ Sala de Med. Interna/ Otro. Habilitada solo en caso que se ha respondido a la pregunta 49 de esta sección con la opción SI |
| 50 | OLSV | Otro Lugar de soporte ventilatorio | Unidad o Servicio donde se ha implantado el soporte ventilatorio, NO INCLUIDO en las opciones anteriores. | Campo para rellenar maximo 100 caracteres. Habilitado solo si se ha respondido a la pregunta anterior con la opción Otro |
| 51 | PSV | Procedimiento del soporte ventilatorio | Procedimiento del soporte ventilatorio. | Opciones: Ventilación Mecánica Invasiva/ Ventilación Mecánica No Invasiva. Habilitada solo en caso que se ha respondido a la pregunta 49 de esta sección con la opción SI |
| 52 | EM | Especialidad del médico responsable del enfermo | Especialidad del médico responsable del enfermo. | Opciones: Neumólogo/ Internista/ Medico de Familia/ UCI general/ UCI respiratoria/ Otra. Habilitada solo en caso que se ha respondido a la pregunta 49 de esta sección con la opción SI |
| 52 | OEM | Otra Especialidad del médico responsable del enfermo | Especialidad del médico responsable del enfermo NO INCLUIDA en las opciones anteriores. | Campo para rellenar maximo 100 caracteres. Habilitado solo si se ha respondido a la pregunta anterior con la opción Otra. |
| 53 | NEU | ¿Se consultó con un neumólogo? | ¿Se consultó con un neumólogo durante el ingreso? | Opciones Si/ No. Habilitada solo en caso que se ha respondido a la pregunta 49 de esta sección con la opción SI |
| 54 | ER | Espirometría al alta. | Espirometría al alta. | Opciones Si/ No. |
| 55 | FEA | Fecha de espirometría al alta | Fecha espirometría más reciente. | Formato dd/mm/aaaa. |
| **Datos clínicos - Durante el ingreso: Parte III: Espirometría al alta** | | | | |
| 56 | E2FVC | FVC (mL) | Capacidad vital forzada medida en mL | FVC en mL. Entero comprendido entre 800 y 3.600. Si hay valores pre y post broncodilatación anotar los más elevados. Habilitada solo si la respuesta a la pregunta 54 de esta sección es SI |
| 57 | E2FVCP | FVC (% del teórico) | Capacidad vital forzada en % del estimado teórico | FVC en % del teórico. Número entero porcentual comprendido entre 30 y 150. Si hay valores pre y post broncodilatación anotar los más elevados. Habilitada solo si la respuesta a la pregunta 54 de esta sección es SI |
| 58 | E2FEV1 | FEV1 (mL) | Volumen de espiración forzada en 1 minuto en mL | FEV1 en mL. Entero comprendido entre 300 y 2.500. Si hay valores pre y post broncodilatación anotar los más elevados. Habilitada solo si la respuesta a la pregunta 54 de esta sección es SI |
| 59 | E2FEV1P | FEV1 (% del teórico) | Volumen de espiración forzada en 1 minuto en % del estimado teórico | FEV1 en % del teórico. Número entero porcentual comprendido entre 20 y 150. Si hay valores pre y post broncodilatación anotar los más elevados. Habilitada solo si la respuesta a la pregunta 54 de esta sección es SI |
| 60 | E2FEVCVF | FEV1/CVF (% real) | Cociente entre FEV1 y la CVF en % del real | FEV1/CVF en % del real. Campo calculado.Formula (Valor pregunta 58/ Valor pregunta 56)x 100. Si hay valores pre y post broncodilatación anotar los más elevados. Habilitada solo si la respuesta a la pregunta 54 de esta sección es SI |
| **Datos clínicos - Durante el ingreso: Parte III: Tratamiento al alta** | | | | |
| 61 | T3OXIGENO | Oxígeno | ¿Se ha dejado Oxigenoterapia para el domicilio?. | Opciones: Si/ No. |
| 62 | T3MACROLIDOS | Macrólidos | ¿Se ha recetado un Macrólido en la formula de Alta?. | Opciones: Si/ No |
| 63 | T3AMOXICILINA | Amoxicilina | ¿Se ha recetado Amoxicilina en la formula de Alta?. | Opciones: Si/ No |
| 64 | T3AMOXICILINACLAV | Amoxicilina Clavulánico | ¿Se ha recetado Amoxicilina Clavulánico en la formula de Alta?. | Opciones: Si/ No |
| 65 | T3CEFALOSPORINAS | Cefalosporinas | ¿Se ha recetado una Cefalosporina en la formula de Alta?. | Opciones: Si/ No |
| 66 | T3QUINOLONAS | Quinolonas | ¿Se ha recetado una Quinolona en la formula de Alta?. | Opciones: Si/ No |
| 67 | T3AGCORTA | Corta duración | ¿Se ha recetado medicamentos de Corta duración en la formula de Alta?. | Opciones: Si/ No |
| 68 | T3AGLARGA | Larga duración en dispensación única | ¿Se ha recetado medicamentos de Larga duración en dispensación única en la formula de Alta?. | Opciones: Si/ No |
| 69 | T3BROIPR | Bromuro de Ipratropio | ¿Se ha recetado Bromuro de Ipratropio en la formula de Alta?. | Opciones: Si/ No |
| 70 | T3BROTIO | Bromuro de Tiotropio | ¿Se ha recetado Bromuro de Tiotropio en la formula de Alta?. | Opciones: Si/ No |
| 71 | T3METILXANTINAS | Metilxantinas | ¿Se ha recetado una Metilxantina (Teofilina o similares) en la formula de Alta?. | Opciones: Si/ No |
| 72 | T3INTRAVENOSOS | Intravenosos | ¿Se han recetado medicamentos de administración Intravenosa en la formula de Alta? | Opciones: Si/ No |
| 73 | T3ORALES | Orales | ¿Se han recetado medicamentos de administración Oral en la formula de Alta? | Opciones: Si/ No |
| 74 | T3INHALADOS | Inhalados en dispensación única | ¿Se han recetado Inhalados en dispensación única en la formula de Alta? | Opciones: Si/ No |
| 75 | T3FLUTICASONA | Fluticasona-Salmeterol | ¿Se ha recetado Fluticasona-Salmeterol en la formula de Alta? | Opciones: Si/ No |
| 76 | T3BUDESONIDA | Budesonida-Formeterol | ¿Se ha recetado Budesonida-Formeterol en la formula de Alta? | Opciones: Si/ No |
| 77 | T3ANTIOXIDANTES | Antioxidantes (N-Acetilcisteina) u otros mucolíticos | ¿Se han recetado Antioxidantes (N-Acetilcisteina) u otros mucolíticos en la formula de Alta? | Opciones: Si/ No |
| 78 | T3ANTITUSIVOS | Antitusivos | ¿Se han recetado Antitusivos en la formula de Alta? | Opciones: Si/ No |
| 79 | T3ESTIMULANTES | Estimulantes respiratorios | ¿Se han recetado Estimulantes respiratorios (Bismesilato de Almitrina) en la formula de Alta? | Opciones: Si/ No |
| 80 | T3VENTILACION | Ventilación mecánica no invasiva | ¿Se ha formulado ventilación mecánica no invasiva para el Alta? | Opciones: Si/ No |
| **Datos clínicos - Durante el ingreso: Parte IV** | | | | |
| 81 | INHA | ¿Hay información documentada de que se ha instruido al paciente en el uso de inhaladores? | ¿Hay información documentada de que se ha instruido al paciente en el uso de inhaladores? | Opciones: Si/ No |
| 82 | IA | ¿Existe documentado algún tipo de intervención antitabaco? | ¿Existe documentado algún tipo de intervención antitabaco? | Opciones: Si/ No |
| 83 | PRA | ¿Se ha cubierto en el informe de alta el aspecto de Planificación o revisión ambulatoria? | ¿Se ha cubierto en el informe de alta el aspecto de Planificación o revisión ambulatoria?. | Opciones: Centro de salud/ Consulta de Neumología/ Otras consultas de especialidad/ Seguimiento domiciliario/ No consta en el informe de alta |
| 84 | RP | ¿Se ha cubierto en el informe de alta el aspecto de Rehabilitac. Pulmonar? | ¿Se ha cubierto en el informe de alta el aspecto de Rehabilitación Pulmonar? | Opciones: Si/ No consta en el informe de alta |
| 85 | EJER | ¿Se ha cubierto en el informe de alta alguna recomendación sobre ejercicio físico? | ¿Se ha cubierto en el informe de alta alguna recomendación sobre ejercicio físico? | Opciones: Si/ No consta en el informe de alta |
| 86 | DIETA | ¿Se ha cubierto en el informe de alta alguna recomendación sobre de dieta? | ¿Se ha cubierto en el informe de alta alguna recomendación sobre de dieta? | Opciones: Si/ No consta en el informe de alta |
| 87 | SSOC | ¿Se ha cubierto en el informe de alta algún comentario sobre el soporte social del paciente? | ¿Se ha cubierto en el informe de alta algún comentario sobre el soporte social del paciente? | Opciones: Si/ No consta en el informe de alta |
| 88 |  | Fecha de alta | Fecha de alta. | Formato dd/mm/aaaa |
| 89 | FC | Fecha en que se rellenó el cuestionario de alta | Fecha en que se rellenó el cuestionario de alta. | Formato dd/mm/aaaa |
| **Datos clínicos - Desenlace** Habilitado solo para casos incluidos | | | | |
| 1 |  | Fecha de alta | Fecha de alta del paciente incluidos. | Formato dd/mm/aaaa |
| 2 | INGRESOS | ¿Ha tenido el paciente algún ingreso hospitalario por cualquier motivo en los 90 días posteriores? | ¿Ha tenido el paciente algún ingreso hospitalario por cualquier motivo en los 90 días posteriores? | Opciones: Si/ No |
| 2 | NINGRESOS | Número de ingresos por todas las causas producidos en el periodo de 90 días siguientes al ingreso índice | Número de ingresos por todas las causas producidos en el periodo de 90 días siguientes al ingreso índice. | Valor positivo entre 0- 90. Habilitada solo si la respuesta a la pregunta anterior es SI |
| 3 | EXACER | Ingresos por exacerbaciones en los 90 días siguientes al ingreso índice por el que se le incluyó en el audit. | Ingresos por exacerbaciones en los 90 días siguientes al ingreso índice por el que se le incluyó en el audit. | Opciones: Si/ No |
| 3 | NEXACER | Número de ingresos por exacerbaciones en los 90 días siguientes al ingreso índice | Número de ingresos por exacerbaciones de la EPOC en los 90 días siguientes al ingreso índice. | Valor positivo entre 0- 6. Habilitada solo si la respuesta a la pregunta anterior es SI |
| 3 | FEXACER1 | Fecha de ingreso por exacerbación 1…n | Fecha de ingreso por exacerbación 1…n | Formato dd/mm/aaaa. Esta variable se repite tantas veces como indique el numero digitado para responder la pregunta anterior |
| 3 | FEXACER2 | Fecha de ingreso por exacerbación 2 | Fecha de ingreso por exacerbación 2. |
| 3 | FEXACER3 | Fecha de ingreso por exacerbación 3 | Fecha de ingreso por exacerbación 3. |
| 4 | NVU | Número de visitas a urgencias por todas las causas en el periodo de 90 días siguientes al ingreso índice | Número de visitas a urgencias por todas las causas en el periodo de 90 días siguientes al ingreso índice. | Valor positivo entre 0 y 12. |
| 5 | PV | ¿Permanecía vivo el paciente a los 90 días tras el alta? | ¿Permanecía vivo el paciente a los 90 días tras el alta?. | Opciones: Si/ No/ Sin información disponible |
| 6 | FMU | Fecha de muerte | Fecha de muerte. | Formato dd/mm/aaaa. Habilitada solo se ha respondido a la pregunta 5 de esta seccion con la opción NO |
| 7 | FUI | Fuente de la información acerca de la muerte | Fuente de la información acerca de la muerte. | Opciones: Familia/ Allegado/ Centro de salud/ Centro de especialidades/ Médico de atención primaria/ Registro de mortalidad comunidad autónoma/ Registro de mortalidad ministerio de sanidad y consumo/ INE/ Otra. Habilitada solo se ha respondido a la pregunta 5 de esta seccion con la opción NO. |
| 7 | OFUI | Otra Fuente de la información acerca de la muerte | Fuente de la información acerca de la muerte, NO INCLUIDA en las opciones anteriores. | Campo para rellenar maximo 100 caracteres. Habilitada solo si la respuesta a la pregunta anterior con la opción Otra |
| 8 | WP | ¿Por que no se sabe que ocurrió con el paciente? | ¿Por que no se sabe que ocurrió con el paciente?. | Campo para rellenar maximo 300 caracteres. Habilitada si se ha respondido a la pregunta 5 de esta sección con la opción Sin información disponible |
| 9 | MH | Lugar donde ocurrió el fallecimiento del paciente | Lugar donde ocurrió el fallecimiento del paciente. | Opciones: En el hospital/ En el domicilio/ Residencia/ Otro. Habilitada solo si la respuesta a la pregunta 5 de esta sección es NO |
| 9 | OMH | Otro Lugar donde ocurrió el fallecimiento del paciente | Lugar donde ocurrió el fallecimiento del paciente, NO INCLUIDO en las opciones anteriores. | Campo para rellenar maximo 100 caracteres. Habilitada solo si la respuesta a la pregunta anterior con la opción Otro |
| 10 | QH | Indicar el hospital | Indicar el hospital. | Campo para rellenar maximo 100 caracteres. Habilitada si se ha respondido a la pregunta 9 de esta sección con la opción Hospital. |
| 11 | RESINF | Persona que rellena el cuestionario. | Persona que rellena el cuestionario. Número de usuario para el audipoc. |  |
| 12 | FCD | Fecha en que se rellenó el cuestionario de desenlace | Fecha en que se relleno el cuestionario de desenlace. | Formato dd/mm/aaaa. |

Variables hospitalarias AUDIPOC España

| **Nº** | **VARIABLE** | **DEFINICIÓN** | **CARACTERÍSTICAS** | **ALERTAS Y RANGOS** |
| --- | --- | --- | --- | --- |
| **FORMULARIO RECURSOS DEL HOSPITAL (FRH)** | | | | |
| 1 | NCA | Código de comunidad autónoma | Número asignado a la Comunidad Autónoma | Valor positivo mayor o igual a 0 |
| 2 | NP | Código de provincia | Número asignado a la Provincia | Valor positivo mayor o igual a 0 |
| 3 | NH | Código de hospital | Número asignado al Hospital | Valor positivo mayor o igual a 0 |
| 4 | PAH | Población de área asignada de hospitalización | Población para la que el hospital cubre las necesidades de hospitalización | Valor positivo mayor o igual a 0 |
| 5 | PAR | Población área de referencia | Población que atiende el centro, tanto hospitalización como consultas externas | Valor positivo mayor o igual a 0 |
| 6 | NIng2007 | Número de ingresos en 2007 (excluyendo Materno-infantil) | Número de ingresos durante 2007, excluyendo los Materno-infantiles | Valor positivo mayor o igual a 0 |
| 7 | NCOPD | Número de pacientes ingresados en 2007 por EPOC en el H. ( Diagnostico principal (ICD9-Cm, ICD10,) | Se excluyen las camas específicamente asignadas a pediatría y ginecología y obstetricia. | Valor positivo mayor o igual a 0 |
| 8 | NCH | Número de camas hospitalarias (excluido hospitalización materno infantil) | Número de ingresos en el hospital por cualquier causa excluyendo ingresos pediátricos, ginecológicos u obstétricos | Valor positivo mayor o igual a 0 |
| 9 | TOH | Tasa de ocupación de camas médicas de agudos (excluido hospitalización materno infantil) | Obtener este dato de los servicios de codificación, admisión o información a traves de los códigos diagnosticos 491.2 ó 496 | Valor positivo mayor o igual a 0,0; puede supera el 100,0% |
| 10 | NCUCI | Número de camas de UCI | Número de camas disponibles en cualquier unidad de vigilancia intensiva, excluidas las unidades de neonatología, UCI pediátrica o UCI maternal. | Valor positivo mayor o igual a 0. Su valor deber ser mayor o igual a sumatoria de n en las variables 11, 12, 13, 14 y 15 |
| 11 | NCUCImq | Número de camas de UCI médico quirurgicas | En caso de que no haya una unidad diferenciada poner cero. | Valor positivo mayor o igual a 0 |
| 12 | NCUCIpol | Número de camas de UCI politraumatizados | En caso de que no haya una unidad diferenciada poner cero. | Valor positivo mayor o igual a 0 |
| 13 | NCUCIcoro | Número de camas de UCI coronaria | En caso de que no haya una unidad diferenciada poner cero. | Valor positivo mayor o igual a 0 |
| 14 | NCUCIrea | Número de camas de UCI reanimación | En caso de que no haya una unidad diferenciada poner cero. | Valor positivo mayor o igual a 0 |
| 15 | NCUCIot | Número de camas de UCI en otras patologías | Número de camas en otras unidades de monitorización para patologías específicas no incluidas en las opciones anteriores. En caso de que no haya una unidad diferenciada poner cero. | Valor positivo mayor o igual a 0 |
| 16 | NcInt | Número de camas de Intermedios | Número de camas disponibles en cualquier unidad de vigilancia intermedia, excluidas las unidades de de vigilancia intermedia de neonatología, pediatría ni maternidad | Valor positivo mayor o igual a 0 |
| 17 | CSDurg | ¿Dispone el hospital de un centro sociosanitario de drenaje para pacientes EPOC desde urgencias? | Existe un hospital de apoyo o cualquier otro centro sanitario al que se deriven pacientes con exacerbación de EPOC directamente desde el S. Urgencias. | Opciones Si/ No |
| 18 | CSDhosp | ¿Dispone el hospital de un centro sociosanitario de drenaje para pacientes EPOC desde hospitalización? | Existe un hospital de apoyo o cualquier otro centro sanitario al que se deriven pacientes con exacerbación de EPOC desde una unidad de hospitalización. | Opciones Si/ No |
| 19 | Huni | ¿Es un hospital universitario? | Hospital que admite estudiantes y MIR en virtud a convenio con Instituciones universitarias. | Opciones Si/ No |
| 20 | THosp | Tipo de hospital: Seleccione la opción que mejor represente o que mejor incluya las características de su Hospital | Grupo 1: Hospitales pequeños sin apenas dotación de ATM y case-mix inferior a 1. Menos de 200 médicos. - Grupo 2: Este grupo contiene muchos hospitales. Menos de 500 camas, peso docente reducido aunque algunos tienen docencia MIR de hasta 8 especialidades distintas, pueden tener algún aparato de ATM y como máximo 2 servicios complejos. El índice de case-mix es superior a 1, con media cercana al 1,3. - Grupo 3: Hospitales Medianos en torno a 500 camas (aunque con alta variabilidad), hasta 160 MIR y entre 100 y 500 médicos; atiende case-mix con cierta complejidad, 1,39 en promedio. - Grupo 4: Grupo de grandes hospitales, pero con menor homogeneidad que entre los del grupo anterior. Entre aproximadamente 500 y 1000 camas y entre 200 y 900 médicos equivalentes a tiempo completo (ETC). Con una media de 4 servicios complejos, se caracteriza por tener un case-mix promedio medio muy alto (1,84), y por la intensidad docente: todos los hospitales del grupo tienen al menos 25 especialidades MIR acreditadas (media de 30) y más de 100 MIR. - Grupo 5: Hospitales muy grandes, con gran peso estructural y mucha actividad asistencial; más de 900 camas; más de 470 médicos y un número medio en torno a 300 MIR en 36 especialidades diferentes (mínimo 17). Muy avanzados tecnológicamente, con amplia cartera de servicios complejos (al menos 5 servicios complejos) y un case-mix medio de 1,618. Los grandes complejos entran en este grupo. | Opciones: Grupo 1/ Grupo 2/ Grupo 3/ Grupo 4/ Grupo 5 |
| 21 | FormResi | ¿Tiene formación de residentes? | ¿Tiene formación de residentes? | Opciones Si/ No. Debe aparecer inhabilitada si la respuesta a la variable 19 es negativa |
| 22 | NFormResi | Nº de residentes que entraron en 2007 | Número de residentes que entraron durante el año 2007 | Valor positivo mayor o igual a 0. Debe aparecer inhabilitada si las respuestas a las variables 19 y/o 21 es negativa. |
| 23 | NTSoc | Nº de trabajadores sociales disponibles para pacientes ingresados en el área médica | Número de trabajadores sociales disponibles para pacientes ingresados en el área médica | Valor positivo mayor o igual a 0 |
| 24 | NFgNe | Número de fisioterapeutas disponibles para fisioterapia respiratoria en el hospital | Número de fisioterapeutas disponibles para fisioterapia respiratoria en el hospital | Valor positivo mayor o igual a 0 |
| 25 | NStNe | Número de médicos de plantilla en Neumología | Se entiende como tales cualquier neumólogo contratado en el momento del estudio con funciones asistenciales, con independencia del tipo de contrato. No cuentan los contratos de guardias si no son para cubrir guardias de neumología | Valor positivo mayor o igual a 0 |
| 26 | NEPOCNe | Nº de neumólogos de plantilla | Neumólogos que atienden pacientes ingresados, tanto EPOC como otras patologías | Valor positivo mayor o igual a 0 |
| 27 | TParcNe | ¿Hay neumólogos contratados a tiempo parcial? | ¿Hay neumólogos contratados a tiempo parcial? | Opciones Si/ No |
| 28 | NJNe | Número de jornadas completas | Número de jornadas a tiempo completo (7 horas/día, 35 horas/semana) que suponen la suma de las jornadas a tiempo parcial | Valor positivo mayor o igual a 0,0 |
| 29 | NReNe | Número de residentes en Neumología | Número de residentes en Neumología | Valor positivo mayor o igual a 0. Debe aparecer inhabilitada si las respuestas a las variables 19 y/o 21 es negativa o el valor de la variable 22 es igual a 0 |
| 30 | Sesiones | ¿Existen sesiones clínicas de neumología? | ¿Existen sesiones clínicas de neumología? | Opciones Si/ No |
| 31 | Nsesiones | Número de sesiones mensuales (en promedio) | Número de sesiones mensuales (en promedio) | Valor positivo mayor o igual a 0. Debe estar deshabilitada si la respuesta a la variable 30 es negativa |
| 32 | NStMI | Número de médicos de plantilla de Medicina Interna | Se entiende como tales cualquier internista contratado en el momento del estudio con funciones asistenciales, con independencia del tipo de contrato. No cuentan los contratos de guardias | Valor positivo mayor o igual a 0 |
| 33 | NStMIP | Número de médicos de plantilla de Medicina Interna que atienden pacientes ingresados | Internistas que atienden pacientes ingresados, tanto EPOC como otras patologías | Valor positivo mayor o igual a 0 |
| 34 | NReMI | Número de residentes en Medicina Interna | Número de residentes en Medicina Interna | Valor positivo mayor o igual a 0. Debe aparecer inhabilitada si las respuestas a las variables 19 y/o 21 es negativa o el valor de la variable 22 es igual a 0 |
| 35 | SesionesMI | ¿Existen sesiones clínicas de M.I? | ¿Existen sesiones clínicas de M.I? | Opciones Si/ No |
| 36 | NsesionesMI | Número de sesiones mensuales en Medicina Interna (en promedio) | Número de sesiones mensuales en Medicina Interna (en promedio) | Valor positivo mayor o igual a 0. Debe estar deshabilitada si la respuesta a la variable 35 es negativa |
|  |  |  |  |  |
| **FORMULARIO DE NEUMOLOGÍA (FNML)** | | | | |
| 1 | Neum | ¿Existe una unidad diferenciada de Neumología? | Se entiende como tal un Servicio, Sección o Unidad con cierta independencia administrativa, aunque forme parte de otro Servicio o Departamento | Opciones Si/ No |
| 2 | SHNe | ¿Existe una sala de hospitalización especifica para Neumología? | Se entiende una sala o zona de hospitalización con camas asignadas a la unidad de neumología y atendida preferentemente por neumólogos | Opciones Si/ No. Debe quedar deshabilitada si la respuesta a la variable 1 es negativa |
| 3 | NCANe | Número de camas adscritas a Neumología | Número de camas adscritas a Neumología | Valor positivo mayor o igual a 0. Debe quedar deshabilitada si la respuesta a la variable 1 es negativa. No debe superar el valor de la variable 8 del FRH |
| 4 | UCINe | ¿Existe una UCI de Neumología? | ¿Existe una UCI de Neumología? | Opciones Si/ No. Debe quedas deshabilitada si la respuesta a la variable 1 es negativa |
| 5 | NCUCINe | Número de camas en UCI de Neumología | Número de camas en UCI de Neumología | Valor positivo mayor o igual a 0. Debe estar deshabilitada si la respuesta a la variable 4 es negativa. No debe superar el valor de la variable 10 del FRH |
| 6 | InNe | ¿Existe una unidad de cuidados intermedios de Neumología? | ¿Existe una unidad de cuidados intermedios de Neumología? | Opciones Si/ No. Debe quedas deshabilitada si la respuesta a la variable 1 es negativa |
| 7 | NCInNe | Número de camas de la unidad de cuidados intermedios de Neumología | Número de camas de la unidad de cuidados intermedios de Neumología | Valor positivo mayor o igual a 0. Debe estar deshabilitada si la respuesta a la variable 6 es negativa. No debe superar el valor de la variable 16 del FRH |
| 8 | NEnfNe | Número de enfermeras en área de hospitalización neumológica | Número de enfermeras en área de hospitalización neumológica | Valor positivo mayor o igual a 0. Debe estar deshabilitada si la respuesta a la variable 2 es negativa o el valor de la variable 3 es igual a 0 |
| 9 | RCEMañ | Ratio Camas/enfermeras turno de mañana | Ratio Camas/enfermeras turno de mañana | Valor positivo mayor o igual a 0,0. Debe estar deshabilitada si la respuesta a la variable 2 es negativa o el valor de la variable 3 es igual a 0 |
| 10 | RCETar | Ratio Camas/enfermeras turno de tarde | Ratio Camas/enfermeras turno de tarde | Valor positivo mayor o igual a 0,0. Debe estar deshabilitada si la respuesta a la variable 2 es negativa o el valor de la variable 3 es igual a 0 |
| 11 | RCENoch | Ratio Camas/enfermeras turno de noche | Ratio Camas/enfermeras turno de noche | Valor positivo mayor o igual a 0,0. Debe estar deshabilitada si la respuesta a la variable 2 es negativa o el valor de la variable 3 es igual a 0 |
| 12 | NAuxNe | Número de auxiliares en área de hospitalización neumológica | Número de auxiliares en área de hospitalización neumológica | Valor positivo mayor o igual a 0. Debe estar deshabilitada si la respuesta a la variable 2 es negativa o el valor de la variable 3 es igual a 0 |
| 13 | RCAMañ | Ratio Camas/auxiliar turno de mañana | Ratio Camas/auxiliar turno de mañana | Valor positivo mayor o igual a 0,0. Debe estar deshabilitada si la respuesta a la variable 2 es negativa o el valor de la variable 3 es igual a 0 |
| 14 | RCATar | Ratio Camas/auxiliar turno de tarde | Ratio Camas/auxiliar turno de tarde | Valor positivo mayor o igual a 0,0. Debe estar deshabilitada si la respuesta a la variable 2 es negativa o el valor de la variable 3 es igual a 0 |
| 15 | RCANoch | Ratio Camas/auxiliar turno de noche | Ratio Camas/auxiliar turno de noche | Valor positivo mayor o igual a 0,0. Debe estar deshabilitada si la respuesta a la variable 2 es negativa o el valor de la variable 3 es igual a 0 |
| 16 | FMI | ¿Existe fisioterapeuta asignado a la planta de Neumología? | ¿Existe fisioterapeuta asignado a la planta de Neumología? | Opciones Si/ No. Debe estar deshabilitada si la respuesta a la variable 2 es negativa o el valor de la variable 3 es igual a 0 |
| 17 | HSfis | Horas/semana de fisioterapia en sala de hospitalización | Horas/semana de fisioterapia en sala de hospitalización (fisioterapia en la propia unidad de neumología) | Valor positivo mayor o igual a 0,0. Debe estar deshabilitada si la respuesta a las variables 2 y 16 es negativa, o el valor de la variable 3 es igual a 0 |
| 18 | NpIng | Número de pacientes ingresados a cargo de neumología en 2007 | Obtener este dato de los servicios de codificación, admisión o información a traves de los códigos diagnosticos 491.2 ó 496 | Valor positivo mayor o igual a 0. Debe quedar deshabilitada si la respuesta a la variable 1 es negativas. No debe superar el valor de la variable 6 del FRH |
| 19 | NpEPOC | Número de pacientes con EPOC ingresados en neumología en 2007 | Obtener este dato de los servicios de codificación, admisión o información a traves de los códigos diagnosticos 491.2 ó 496 | Valor positivo mayor o igual a 0. Debe quedar deshabilitada si la respuesta a las variables 1 es negativa y el valor de la variable 19 es igual a 0. No debe superar al valor de la variable 18, ni el valor de la variable 7 del FRH. |
| 20 | Pperi | ¿Ingresan pacientes periféricos a cargo de neumología? | Obtener este dato de los servicios de codificación, admisión o información a traves de los códigos diagnosticos 491.2 ó 496. Incluye los pacientes periféricos | Opciones Si/ No. Debe quedar deshabilitada si la respuesta a las variables 1 y 2 es negativa y el valor de la variable 3 es igual a 0 |
| 21 | NpPeri | Número de pacientes periféricos a cargo de neumología en 2007 | Obtener este dato de los servicios de codificación, admisión o información a traves de los códigos diagnosticos 491.2 ó 496. Incluye los pacientes periféricos | Valor positivo mayor o igual a 0. Debe estar deshabilitada si la respuesta a las variables 1, 2 y 20 es negativa , el valor de la variable 3 y/o 18 es igual a 0. No debe superar el valor de las variables 18 y 19, ni el valor de la variable 6 del FRH |
| 22 | NpPeriEPOC | Número de pacientes periféricos con EPOC | Obtener este dato de los servicios de codificación, admisión o información a traves de los códigos diagnosticos 491.2 ó 496. Incluye los pacientes periféricos | Valor positivo mayor o igual a 0. Debe estar deshabilitada si la respuesta a las variables 1, 2 y 20 es negativa, o el valor de la variables 3. 18 y 21 es igual a 0. No debe superar el valor de las variables 18, 19 y 21, ni el de la variable 7 del FRH |
| 23 | PPEneMarNU | Porcentaje de pacientes periféricos de Enero a Marzo del 2007 | Porcentaje estimado de pacientes periféricos respecto al total, en los meses de enero a marzo de 2007 | Valor positivo mayor de 0.0 pero inferior o igual a 100.0. Debe estar deshabilitada si la respuesta a las variables 1, 2 y 20 es negativa o el valor de la variable 3, 18 o 21 es igual a 0 |
| 24 | GpresenNeu | ¿Hay guardias presenciales de 24 horas de Neumólogos de plantilla? | ¿Hay guardias presenciales de 24 horas de Neumólogos de plantilla? | Opciones Si/ No. Debe estar deshabilitada si la respuesta a las variables 1 y 2 es negativa, o la variable 26 del FRH es igual a 0 |
| 25 | GpresenMIR | ¿Hay guardias de neumología cubiertas por MIR? | ¿Hay guardias de neumología cubiertas por MIR? | Opciones Si/ No. Debe estar deshabilitada si la respuesta a las variables 1 y 2 es negativa, o cuando las variables 19 y 21 del FRH son negativas y el valor de la variable 22 del FRH es igual a 0 |
| 26 | NmGuarNeu | Número de médicos de guardia presencial de neumología (MIR+Staff) | Número de médicos de guardia presencial de neumología (MIR+Staff) | Valor positivo mayor o igual a 0. Debe estar deshabilitada si la respuesta a las variables 1, 2, 24 y 25 es negativa o el valor de la variable 3 es igual a 0 |
| 27 | GlocNeu | ¿Hay guardias localizadas de neumología? | ¿Hay guardias localizadas de neumología? | Opciones Si/ No. Debe estar deshabilitada si la respuesta a las variables 1 y 2 es negativa o el valor de la variable 3 es igual a 0 |
| 28 | Refuerz | ¿Hay refuerzos en neumología fuera de la jornada laboral? | ¿Hay refuerzos en neumología fuera de la jornada laboral? | Opciones Si/ No. Debe estar deshabilitada si la respuesta a las variables 1 y 2 es negativa o el valor de la variable 3 es igual a 0 |
|  |  |  |  |  |
| **FORMULARIO DE M.I. (FMI)** | | | | |
| 1 | MI | ¿Existe una unidad diferenciada de Medicina Interna? | Se entiende como tal un Servicio, Sección o Unidad con cierta independencia administrativa, aunque forme parte de otro Servicio o Departamento | Opciones Si/ No |
| 2 | SHMI | ¿Existe una sala de hospitalización especifica para Medicina Interna? | Se entiende una sala o zona de hospitalización con camas asignadas a Medicina Interna. | Opciones Si/ No. Debe quedar deshabilitada si la respuesta a la variable 1 es negativa |
| 3 | NCAMI | Número de camas de hospitalización en Medicina Interna | En hospitales que una misma zona la comparten Medicina Interna y otras especialidades médicas indistintamente, señalar el número de camas totales | Valor positivo mayor o igual a 0. Debe quedar deshabilitada si la respuesta a la variable 1 es negativa. No debe superar el valor de la variable 8 del FRH |
| 4 | NEnfMI | Número de enfermeras que atienden pacientes ingresados en la sala de Medicina Interna | Número de enfermeras que atienden pacientes ingresados en la sala de Medicina Interna | Valor positivo mayor o igual a 0. Debe estar deshabilitada si la respuesta a la variable 2 es negativa o el valor de la variable 3 es igual a 0 |
| 5 | RCEMañMI | Ratio Camas/enfermeras turno de mañana | Ratio Camas/enfermeras turno de mañana | Valor positivo mayor o igual a 0,0. Debe estar deshabilitada si la respuesta a la variable 2 es negativa o el valor de la variable 3 es igual a 0 |
| 6 | RCETarMI | Ratio Camas/enfermeras turno de tarde | Ratio Camas/enfermeras turno de tarde | Valor positivo mayor o igual a 0,0. Debe estar deshabilitada si la respuesta a la variable 2 es negativa o el valor de la variable 3 es igual a 0 |
| 7 | RCENochMI | Ratio Camas/enfermeras turno de noche | Ratio Camas/enfermeras turno de noche | Valor positivo mayor o igual a 0,0. Debe estar deshabilitada si la respuesta a la variable 2 es negativa o el valor de la variable 3 es igual a 0 |
| 8 | NAuxMI | Número de auxiliares de clínica que atienden pacientes ingresados en la sala de Medicina Interna | Número de auxiliares de clínica que atienden pacientes ingresados en la sala de Medicina Interna | Valor positivo mayor o igual a 0. Debe estar deshabilitada si la respuesta a la variable 2 es negativa o el valor de la variable 3 es igual a 0 |
| 9 | RCAMañMI | Ratio Camas/auxiliar turno de mañana | Ratio Camas/auxiliar turno de mañana | Valor positivo mayor o igual a 0,0. Debe estar deshabilitada si la respuesta a la variable 2 es negativa o el valor de la variable 3 es igual a 0 |
| 10 | RCATarMI | Ratio Camas/auxiliar turno de tarde | Ratio Camas/auxiliar turno de tarde | Valor positivo mayor o igual a 0,0. Debe estar deshabilitada si la respuesta a la variable 2 es negativa o el valor de la variable 3 es igual a 0 |
| 11 | RCANochMI | Ratio Camas/auxiliar turno de noche | Ratio Camas/auxiliar turno de noche | Valor positivo mayor o igual a 0,0. Debe estar deshabilitada si la respuesta a la variable 2 es negativa o el valor de la variable 3 es igual a 0 |
| 12 | FMI | ¿Existe fisioterapeuta asignado a la planta de Medicina Interna? | ¿Existe fisioterapeuta asignado a la planta de Medicina Interna? | Opciones Si/ No. Debe quedar deshabilitada si la respuesta a la variable 2 es negativa o el valor de la variable 3 es igual a 0 |
| 13 | HSfisMI | Horas/semana de fisioterapeutas dedicados a Medicina Interna | Horas/semana de fisioterapeutas dedicados a Medicina Interna | Valor positivo mayor o igual a 0,0. Debe estar deshabilitada si la respuesta a las variables 2 y 12 es negativa o el valor de la variable 3 es igual a 0 |
| 14 | NpIngMI | Número de pacientes ingresados a cargo de Medicina Interna en 2007 | Obtener este dato de los servicios de codificación, admisión o información a traves de los códigos diagnosticos 491.2 ó 496. Incluye los pacientes periféricos | Valor positivo mayor o igual a 0. Debe estar deshabilitada si la respuesta a la variable 1 es negativa. No puede superar el valor de la variable 6 del FRH |
| 15 | NpEPOCMI | Número de pacientes ingresados por EPOC a cargo de Medicina Interna en 2007 | Obtener este dato de los servicios de codificación, admisión o información a traves de los códigos diagnosticos 491.2 ó 496. Incluye los pacientes periféricos | Valor positivo mayor o igual a 0. Debe estar deshabilitada si la respuesta a la variable 1 es negativa. No debe superar el valor de la variable 14, ni el valor de la variable 7 del FRH. |
| 16 | PPMI | ¿Hay pacientes periféricos a cargo de Medicina Interna? | ¿Hay pacientes periféricos a cargo de Medicina Interna? | Opciones Si/ No. Debe quedar deshabilitada si la respuesta a las variable 1 y 2 es negativa o el valor de la variable 3 es igual a 0 |
| 17 | NpPeriMI | Número de pacientes periféricos a cargo de Medicina Interna en 2007 | Número de pacientes periféricos a cargo de Medicina Interna en 2007 | Valor positivo mayor o igual a 0. Debe estar deshabilitada si la respuesta a las variables 1, 2 y 16 es negativa o el valor de las variables 3 y 14 es igual a 0. No debe superar el valor de las variables 14 y 15, ni el valor de la variable 6 del FRH |
| 18 | NpPeriEPOCMI | Número de pacientes periféricos con EPOC a cargo de Medicina Interna en 2007 | Número de pacientes periféricos con EPOC a cargo de Medicina Interna en 2007 | Valor positivo mayor o igual a 0. Debe estar deshabilitada si la respuesta a las variables 1, 2 y 16 es negativa, o el valor de las variables 3,14 y 15 es igual a 0. No debe superar el valor de la variable 14, 15 y 17, ni el valor de la variable 7 del FRH |
| 19 | PPEneMarMI | Porcentaje de pacientes periféricos de Enero a Marzo del 2007 | Porcentaje estimado de pacientes periféricos respecto al total, en los meses de enero a marzo de 2007 | Valor positivo mayor o igual a 0.0 pero inferior o igual a 100.0%. Debe estar deshabilitada si la respuesta a la variable 1, 2 y 16 es negativa o el valor de la variable 3, 14 y 17 es igual a 0 |
| 20 | GpresenMI | ¿Hay guardias presenciales de 24 horas cubiertas por médicos de plantilla de MI? | ¿Hay guardias presenciales de 24 horas cubiertas por médicos de plantilla de MI? | Opciones Si/ No. Debe estar deshabilitada si la respuesta a las variables 1 y 2 es negativa, o la variable 32 del FRH es igual a 0 |
| 21 | GpresenMIR | ¿Hay guardias presenciales de 24 horas de médicos residentes de MI? | ¿Hay guardias presenciales de 24 horas de médicos residentes de MI? | Opciones Si/ No. Debe estar deshabilitada si la respuesta a las variables 1 y 2 es negativa, o cuando las variables 19 y 21 del FRH son negativas, o el valor de la variable 22 del FRH es igual a 0 |
| 22 | NmGuarMI | Número de médicos de guardia en Medicina Interna (Plantilla+Residente) | Número de médicos de guardia en Medicina Interna (Plantilla+Residente) | Valor positivo mayor o igual a 0. Debe estar deshabilitada si la respuesta a las variables 1, 2, 20 y 21 es negativa, o el valor de la variable 3 es igual a 0 |
| 23 | GlocMI | ¿Hay guardias localizadas de Medicina Interna? | ¿Hay guardias localizadas de Medicina Interna? | Opciones Si/ No. Debe quedar deshabilitada si la respuesta a las variables 1 y 2 es negativa o el valor de la variable 3 es igual a 0 |
| 24 | RefuerzMI | ¿Hay refuerzos en Medicina Interna fuera de la jornada laboral? | ¿Hay refuerzos en Medicina Interna fuera de la jornada laboral? | Opciones Si/ No. Debe quedar deshabilitada si la respuesta a las variables 1 y 2 es negativa o el valor de la variable 3 es igual a 0 |
|  |  |  |  |  |
| **FORMULARIO DE GERIATRIA (FG)** | | | | |
| 1 | GE | ¿Existe una unidad diferenciada de Geriatría? | ¿Existe una unidad diferenciada de Geriatría? | Opciones Si/ No |
| 2 | SHGE | ¿Existe una sala de hospitalización de Geriatría? | Se entiende una sala o zona de hospitalización con camas asignadas a Geriatría. | Opciones Si/ No. Debe quedar deshabilitada si la respuesta a la variable 1 es negativa |
| 3 | NCAGE | Número de camas de hospitalización en Geriatría | Número de camas de hospitalización en Geriatría | Valor positivo mayor o igual a 0. Debe quedar deshabilitada si la respuesta a la variable 1 es negativa. No debe superar el valor de la variable 6 del FRH |
| 4 | UCCIGE | ¿Existe una unidad de cuidados críticos o intermedios de Geriatría? | ¿Existe una unidad de cuidados críticos o intermedios de Geriatría? | Opciones Si/ No. Debe quedar deshabilitada si la respuesta a la variable 1 es negativa |
| 5 | NCUCIGE | Número de camas de UCI o de Intermedios en Geriatría | Zumatoria del número de camas de UCI y/o de Intermedios en Geriatría | Valor positivo mayor o igual a 0. Debe estar deshabilitada si la respuesta a la variable 4 es negativa. No debe superar el valor de la variables 10 y/o 16 del FRH, de acuerdo al caso |
| 6 | NStGE | Número de médicos de plantilla de Geriatría | Se entiende como tales cualquier geriatra contratado en el momento del estudio con funciones asistenciales, con independencia del tipo de contrato. No cuentan los contratos de guardias | Valor positivo mayor o igual a 0 |
| 7 | NStGEP | Número de geriatras que atienden pacientes ingresados | Geriatras que atienden pacientes ingresados, tanto EPOC como otras patologías | Valor positivo mayor o igual a 0 |
| 8 | NReGE | Número de residentes en Geriatría | Número de residentes en Geriatría | Valor positivo mayor o igual a 0. Debe aparecer inhabilitada si las respuestas a las variables 19 y/o 21 del FRH son negativas o el valor de la variable 22 del FRH es igual a 0 |
| 9 | NEnfGE | Número de enfermeras que atienden pacientes ingresados en la sala de Geriatría | Número de enfermeras que atienden pacientes ingresados en la sala de Geriatría | Valor positivo mayor o igual a 0. Debe estar deshabilitada si la respuesta a la variable 2 es negativa o el valor de la variable 3 es igual a 0 |
| 10 | RCEMañGE | Ratio Camas/enfermeras turno de mañana | Ratio Camas/enfermeras turno de mañana | Valor positivo mayor o igual a 0,0. Debe estar deshabilitada si la respuesta a la variable 2 es negativa o el valor de la variable 3 es igual a 0 |
| 11 | RCETarGE | Ratio Camas/enfermeras turno de tarde | Ratio Camas/enfermeras turno de tarde | Valor positivo mayor o igual a 0,0. Debe estar deshabilitada si la respuesta a la variable 2 es negativa o el valor de la variable 3 es igual a 0 |
| 12 | RCENochGE | Ratio Camas/enfermeras turno de noche | Ratio Camas/enfermeras turno de noche | Valor positivo mayor o igual a 0,0. Debe estar deshabilitada si la respuesta a la variable 2 es negativa o el valor de la variable 3 es igual a 0 |
| 13 | NAuxGE | Número de auxiliares de clínica en hospitalización geriátrica | Número de auxiliares de clínica en hospitalización geriátrica | Valor positivo mayor o igual a 0. Debe estar deshabilitada si la respuesta a la variable 2 es negativa o el valor de la variable 3 es igual a 0 |
| 14 | RCAMañGE | Ratio Camas/auxiliar turno de mañana | Ratio Camas/auxiliar turno de mañana | Valor positivo mayor o igual a 0,0. Debe estar deshabilitada si la respuesta a la variable 2 es negativa o el valor de la variable 3 es igual a 0 |
| 15 | RCATarGE | Ratio Camas/auxiliar turno de tarde | Ratio Camas/auxiliar turno de tarde | Valor positivo mayor o igual a 0,0. Debe estar deshabilitada si la respuesta a la variable 2 es negativa o el valor de la variable 3 es igual a 0 |
| 16 | RCANochGE | Ratio Camas/auxiliar turno de noche | Ratio Camas/auxiliar turno de noche | Valor positivo mayor o igual a 0,0. Debe estar deshabilitada si la respuesta a la variable 2 es negativa o el valor de la variable 3 es igual a 0 |
| 17 | FGE | ¿Existen fisioterapeutas asignados a la planta de Geriatría? | ¿Existen fisioterapeutas asignados a la planta de Geriatría? | Opciones Si/ No. Debe quedar deshabilitada si la respuesta a la variable 2 es negativa o el valor de la variable 3 es igual a 0 |
| 18 | HSfisGE | Horas/semana de fisioterapeutas dedicados a Geriatría | Horas/semana de fisioterapeutas dedicados a Geriatría | Valor positivo mayor o igual a 0,0. Debe estar deshabilitada si la respuesta a las variables 2 y 12 es negativa o el valor de la variable 3 es igual a 0 |
| 19 | NTSocGE | Número de trabajadores sociales disponibles para pacientes ingresados en Geriatría | Número de trabajadores sociales disponibles para pacientes ingresados en Geriatría | Valor positivo mayor o igual a 0. Debe quedar deshabilitada si la respuesta a la variable 2 es negativa o el valor de la variable 3 es igual a 0 |
| 20 | NpIngGE | Número de pacientes ingresados en Geriatría en 2007 | Obtener este dato de los servicios de codificación, admisión o información a traves de los códigos diagnosticos 491.2 ó 496. Incluye los pacientes periféricos | Valor positivo mayor o igual a 0. Debe estar deshabilitada si la respuesta a la variable 1 es negativa. No debe superar el valor de la variable 6 del FRH |
| 21 | NpEPOCGE | Número de pacientes ingresados por EPOC en Geriatría en 2007 | Obtener este dato de los servicios de codificación, admisión o información a traves de los códigos diagnosticos 491.2 ó 496. Incluye los pacientes periféricos | Valor positivo mayor o igual a 0. Debe estar deshabilitada si la respuesta a la variable 1 es negativa o el valor de la variable 20 es igual a 0. No debe superar el valor de la variable 20, ni el valor de la variable 7 del FRH |
| 22 | PPGE | ¿Hay pacientes periféricos a cargo de Geriatria? | ¿Hay pacientes periféricos a cargo de Geriatria? | Opciones Si/ No. Debe estar deshabilitada si la respuesta a las variables 1 y 2 es negativa o el valor de la variable 3 es igual a 0 |
| 23 | NpPeriGE | Número de pacientes periféricos a cargo de Geriatría en 2007 | Número de pacientes periféricos a cargo de Geriatría en 2007 | Valor positivo mayor o igual a 0. Debe estar deshabilitada si la respuesta a las variables 1 y 2 es negativa o el valor de la variable 3 es igual a 0 |
| 24 | NpPeriEPOCGE | Número de pacientes periféricos con EPOC ingresados en Geriatría en 2007 | Número de pacientes periféricos con EPOC ingresados en Geriatría en 2007 | Valor positivo mayor o igual a 0. Debe estar deshabilitada si la respuesta a las variables 1 y 2 es negativa o el valor de la variable 3 es igual a 0 |
| 25 | PPEneMarGE | Porcentaje de pacientes periféricos de Enero a Marzo del 2007 | Porcentaje estimado de pacientes periféricos respecto al total, en los meses de enero a marzo de 2007 | Valor positivo mayor o igual a 0,0 pero inferior o igual a 100,0%. Debe estar deshabilitada si la respuesta a las variables 1 y 2 es negativa o el valor de la variable 3 es igual a 0 |
| 26 | GpresenGE | ¿Existen médicos geriatras de plantilla con guardia presencial de 24 horas? | ¿Existen médicos geriatras de plantilla con guardia presencial de 24 horas? | Opciones Si/ No. Debe estar deshabilitada si la respuesta a las variables 1 y 2 es negativa, o la variable 6 es igual a 0 |
| 27 | GpresenRGE | ¿Hay guardias presenciales de 24 horas de residentes de geriatría? | ¿Hay guardias presenciales de 24 horas de residentes de geriatría? | Opciones Si/ No. Debe estar deshabilitada si la respuesta a las variables 1 y 2 es negativa, o cuando las variables 19 y 21 del FRH son negativas, o el valor de la variable 22 del FRH es igual a 0 |
| 28 | NmGuarGE | Número de médicos de guardia en Geriatría (Plantilla+Residente) | Número de médicos de guardia en Geriatría (Plantilla+Residente) | Valor positivo mayor o igual a 0. Debe estar deshabilitada si la respuesta a las variables 1, 2, 26 y 27 es negativa, o el valor de la variable 3 es igual a 0 |
| 29 | GlocGE | ¿Hay médicos con guardias localizadas de Geriatría? | ¿Hay médicos con guardias localizadas de Geriatría? | Opciones Si/ No. Debe quedar deshabilitada si la respuesta a las variables 1 y 2 es negativa o el valor de la variable 3 es igual a 0 |
| 30 | RefuerzGE | ¿Hay refuerzos en Geriatría fuera de la jornada laboral? | ¿Hay refuerzos en Geriatría fuera de la jornada laboral? | Opciones Si/ No. Debe quedar deshabilitada si la respuesta a las variables 1 y 2 es negativa o el valor de la variable 3 es igual a 0 |
| 31 | SesionesGE | ¿Existen sesiones clínicas de geriatría? | ¿Existen sesiones clínicas de geriatría? | Opciones Si/ No |
| 32 | NsesionesGE | Número de sesiones mensuales en promedio en Geriatría | Número de sesiones mensuales en promedio en Geriatría | Valor positivo mayor o igual a 0. Debe estar deshabilitada si la respuesta a la variable 31 es negativa |
|  |  |  |  |  |
| **FORMULARIO DE URGENCIAS (FURG)** | | | | |
| 1 | PSU | ¿Hay una plantilla médica adscrita al servicio de Urgencias? | Plantilla Médica específicamente contratada para cubrir la asistencia Urgente | Opciones Si/ No |
| 2 | PMSU | ¿Cuantos miembros componen la plantilla médica del S. Urgencias? | ¿Cuantos miembros componen la plantilla médica del S. Urgencias? | Valor positivo mayor de 0. Debe ser igual a la sumatoria de los valores obtenidos en las variables |
| 3 | FamGenSU | ¿Hay médicos de Familia/generalistas en la plantilla? | ¿Hay médicos de Familia/generalistas en la plantilla? | Opciones Si/ No |
| 4 | FamIntSU | ¿Hay médicos de Mediicna Interna u otras especialidades médicas en la plantilla? | ¿Hay médicos de Medicina Interna u otras especialidades médicas en la plantilla? | Opciones Si/ No |
| 5 | OtrasEspSU | ¿Hay médicos de otras especialidades en la plantilla? | ¿Hay médicos de otras especialidades en la plantilla? | Opciones Si/ No |
| 6 | GoTSU | ¿Como se organiza la cobertura de 24 horas? | Opciones Guardias/Turnos/Ambas | Opciones Guardias/Turnos/Ambas |
| 7 | MPJLMañSU | ¿Cuantos medicos de plantilla hay durante la jornada laboral de la mañana? | Medicos de plantilla de presencia fisica durante jornada laboral de la mañana | Valor positivo mayor o igual a 0 |
| 8 | MPFJMañSU | ¿Cuantos medicos de plantilla hay fuera de la jornada laboral de la mañana? | Medicos de plantilla de presencia fisica fuera de la jornada laboral de la mañana | Valor positivo mayor o igual a 0 |
| 9 | MPJLTarSU | ¿Cuantos medicos de plantilla hay durante la jornada laboral de la tarde? | Medicos de plantilla de presencia fisica durante jornada laboral de la tarde | Valor positivo mayor o igual a 0 |
| 10 | MPFJTarSU | ¿Cuantos medicos de plantilla hay fuera de la jornada laboral de la tarde? | Medicos de plantilla de presencia fisica fuera de la jornada laboral de la tarde | Valor positivo mayor o igual a 0 |
| 11 | MPJLNochSU | ¿Cuantos medicos de plantilla hay durante la jornada laboral de la noche? | Medicos de plantilla de presencia fisica durante jornada laboral de la noche | Valor positivo mayor o igual a 0 |
| 12 | MPFJNochSU | ¿Cuantos medicos de plantilla hay fuera de la jornada laboral de la noche? | Medicos de plantilla de presencia fisica fuera de la jornada laboral de la noche | Valor positivo mayor o igual a 0 |
| 13 | MRJLMañSU | ¿Cuantos medicos residentes hay durante la jornada laboral de la mañana? | Medicos residentes de presencia fisica durante jornada laboral de la mañana | Valor positivo mayor o igual a 0. Debe estar deshabilitada si la respuesta a las variables 19 y 21 del FRH es negativa o el valor de la variable 22 del FRH es igual a 0 |
| 14 | MRFJMañSU | ¿Cuantos medicos residentes hay fuera de la jornada laboral de la mañana? | Medicos residentes de presencia fisica fuera de la jornada laboral de la mañana | Valor positivo mayor o igual a 0. Debe estar deshabilitada si la respuesta a las variables 19 y 21 del FRH es negativa o el valor de la variable 22 del FRH es igual a 0 |
| 15 | MRJLTarSU | ¿Cuantos medicos residentes hay durante la jornada laboral de la tarde? | Medicos residentes de presencia fisica durante jornada laboral de la tarde | Valor positivo mayor o igual a 0. Debe estar deshabilitada si la respuesta a las variables 19 y 21 del FRH es negativa o el valor de la variable 22 del FRH es igual a 0 |
| 16 | MRFJTarSU | ¿Cuantos medicos residentes hay fuera de la jornada laboral de la tarde? | Medicos residentes de presencia fisica fuera de la jornada laboral de la tarde | Valor positivo mayor o igual a 0. Debe estar deshabilitada si la respuesta a las variables 19 y 21 del FRH es negativa o el valor de la variable 22 del FRH es igual a 0 |
| 17 | MRJLNochSU | ¿Cuantos medicos residentes hay durante la jornada laboral de la noche? | Medicos residentes de presencia fisica durante jornada laboral de la noche | Valor positivo mayor o igual a 0. Debe estar deshabilitada si la respuesta a las variables 19 y 21 del FRH es negativa o el valor de la variable 22 del FRH es igual a 0 |
| 18 | MRFJNochSU | ¿Cuantos medicos residentes hay fuera de la jornada laboral de la noche? | Medicos residentes de presencia fisica fuera de la jornada laboral de la noche | Valor positivo mayor o igual a 0. Debe estar deshabilitada si la respuesta a las variables 19 y 21 del FRH es negativa o el valor de la variable 22 del FRH es igual a 0 |
| 19 | DUEMañSU | ¿Cuantos DUE/enfermeras hay en el turno de mañana? | ¿Cuantos DUE/enfermeras hay en el turno de mañana? | Valor positivo mayor o igual a 0 |
| 20 | DUETarSU | ¿Cuantos DUE/enfermeras hay en el turno de tarde? | ¿Cuantos DUE/enfermeras hay en el turno de tarde? | Valor positivo mayor o igual a 0 |
| 21 | DUENochSU | ¿Cuantos DUE/enfermeras hay en el turno de noche? | ¿Cuantos DUE/enfermeras hay en el turno de noche? | Valor positivo mayor o igual a 0 |
| 22 | AuxEnfMañSU | ¿Cuantos Auxiliares de enfermería hay en el turno de mañana? | ¿Cuantos Auxiliares de enfermería hay en el turno de mañana? | Valor positivo mayor o igual a 0 |
| 23 | AuxEnfTarSU | ¿Cuantos Auxiliares de enfermería hay en el turno de tarde? | ¿Cuantos Auxiliares de enfermería hay en el turno de tarde? | Valor positivo mayor o igual a 0 |
| 24 | AuxEnfNochSU | ¿Cuantos Auxiliares de enfermería hay en el turno de noche? | ¿Cuantos Auxiliares de enfermería hay en el turno de noche? | Valor positivo mayor o igual a 0 |
| 25 | ZHSU | ¿Existe una zona de hospitalización en la Urgencia? | ¿Existe una zona de hospitalización en la Urgencia? | Opciones Si/ No |
| 26 | NCZHSU | Número de camas en la zona de hospitalización | Número de camas en la zona de hospitalización | Valor positivo mayor o igual a 0. Debe estar deshabilitada si la respuesta a la variable 25 es negativa |
| 27 | BoxesSU | ¿Cuantos boxes o unidades de exploración médico-quirúrgica hay en la Urgencia? | ¿Cuantos boxes o unidades de exploración médico-quirúrgica hay en la Urgencia? | Valor positivo mayor o igual a 0 |
| 28 | ZObsSU | ¿Hay una zona de observación o de corta estancia diferenciada de la zona de hospitalización de Urgencias | En caso de que la zona de hospitalización y observación coincidan, consignar toda la información en la zona de hospitalización de Urgencias | Opciones Si/ No |
| 29 | NCZObsSU | Nº de camas en la zona de observación o de corta estancia | Nº de camas en la zona de observación o de corta estancia | Valor positivo mayor o igual a 0. Debe estar deshabilitada si la respuesta a la variable 28 es negativa |
| 30 | AtenPacHLabSU | ¿El servicio de medicina interna atiende pacientes en el área de urgencias en H. Laboral? | Se refiere al hecho de que un paciente con patología médica sea atendido por Medicina Interna en el servicio de Urgencias, bien directamente o bien a petición de otro médico de Urgencias en horario laboral | Opciones Si/ No |
| 31 | AtenPacNoHLabSU | ¿El servicio de medicina interna atiende pacientes en el área de urgencias fuera del H. La | Se refiere al hecho de que un paciente con patología médica sea atendido por Medicina Interna en el servicio de Urgencias, bien directamente o bien a petición de otro médico de Urgencias, fuera del horario laboral | Opciones Si/ No |
| 32 | AtenPacStaffSU | ¿El servicio de neumología atiende pacientes en el área de urgencias en H. Laboral? | Se refiere al hecho de que un paciente sea atendido por un neumólogo en el servicio de Urgencias, bien directamente o bien a petición de otro médico de Urgencias, en horario laboral | Opciones Si/ No |
| 33 | AtenPacStaff1SU | ¿El servicio de neumología atiende pacientes en el área de urgencias fuera del H. Laboral? | Se refiere al hecho de que un paciente sea atendido por un neumólogo en el servicio de Urgencias, bien directamente o bien a petición de otro médico de Urgencias, fuera del horario laboral | Opciones Si/ No |
| 34 | SCiruSU | ¿Hay disponible Servicio de Cirugía en Urgencias? | ¿Hay disponible Servicio de Cirugía en Urgencias? | Opciones Si/ No |
| 35 | SPsiSU | ¿Hay disponible Servicio de Psiquiatría en Urgencia? | ¿Hay disponible Servicio de Psiquiatría en Urgencia? | Opciones Si/ No |
| 36 | UCISU | ¿Existe unidad de cuidados intermedios adscrita al Servicio de Urgencias? | ¿Existe unidad de cuidados intermedios adscrita al Servicio de Urgencias? | Opciones Si/ No |
| 37 | NCCISU | Nº camas de la unidad de cuidados intermedios | Nº camas de la unidad de cuidados intermedios | Valor positivo mayor o igual a 0. Debe estar deshabilitada si la respuesta a la variable 36 es negativa |
| 38 | NUrg2SU | Nº de urgencias totales atendidas en 2007 (excluidas urgencias materno-infantiles) | Nº de urgencias totales atendidas en 2007 (excluidas urgencias materno-infantiles) | Valor positivo mayor o igual a 0 |
| 39 | NUrg1SU | Nº de urgencias medico-quirúrgicas atendidas en 2007 incluidas urgencias materno-infantiles | Nº de urgencias que precisaron tratamiento medico-quirúrgicas atendidas en 2007 incluidas urgencias materno-infantiles | Valor positivo mayor o igual a 0. No debe superar el valor de la variable 38 |
| 40 | TriajeSU | ¿Existe un sistema de triaje o clasificación del paciente al llegar a Urgencias? | Sistema para clasificar a los pacientes por patología y gravedad | Opciones Si/ No |
| 41 | ProfTriajeSU | ¿Que profesional que habitualmente realiza el triaje? | ¿Que profesional realiza el triaje? | Opciones Medico/ Residente/ DUE/ Técnico sanitario, Otro (explique). |
| 42 | EspPrimerSU | Especialidad habitual del primer médico que valora al paciente | Especialidad del primer médico que valora al paciente | Opciones Atención primaria/ Especialidad en urgencias/ Medicina Interna o subespecialidades/ Otra (explique). |
| 43 | PosPrimerSU | Posición del primer médico que valora habitualmente al paciente | Posición del primer médico que valora al paciente | Opciones: Residente/ Plantilla o adjunto. |
| 44 | EspEPOCPrimerSU | Especialidad del médico que decide habitualmente el ingreso del paciente con eEPOC | Especialidad del médico que decide el ingreso del paciente con eEPOC | Opciones: Atención primaria/ Especialidad en urgencias/ Medicina Interna o subespecialidades/ Neumología/ Otra (explique). |
| 45 | PosEPOCPrimerSU | Posición del médico que decide habitualmente el ingreso del paciente con eEPOC | Posición del médico que decide el ingreso del paciente con eEPOC | Opciones: Residente/Plantilla o adjunto. |
| 46 | VMIHosp | ¿Hay disponibilidad en el hospital para el tratamiento con Ventilación mecánica invasiva del paciente con eEPOC? | ¿Hay disponibilidad en el hospital para el tratamiento con Ventilación mecánica invasiva del paciente con eEPOC? | Opciones Si/ No |
| 47 | VMNIHosp | ¿Hay disponibilidad en el hospital para el tratamiento con Ventilación mecánica no invasiva (VMNI) del paciente con eEPOC? | En cualquier zona y por cualquier especialista | Opciones Si/ No |
| 48 | VMNIUCI | ¿Hay disponibilidad para el tratamiento con Ventilación mecánica no invasiva (VMNI) del paciente con Eepoc en UCI? | ¿Hay disponibilidad para el tratamiento con Ventilación mecánica no invasiva (VMNI) del paciente con Eepoc en UCI? | Opciones Si/ No |
| 49 | VMNIHLab | ¿Hay disponibilidad para el tratamiento con (VMNI) del paciente con eEPOC en planta de hospitalización en horario laboral? | ¿Hay disponibilidad para el tratamiento con (VMNI) del paciente con eEPOC en planta de hospitalización e | Opciones Si/ No |
| 50 | VMNINoHLab | ¿Hay disponibilidad para el tratamiento con (VMNI) del paciente con eEPOC en planta de hospitalización fuera del horario laboral? | ¿Hay disponibilidad para el tratamiento con (VMNI) del paciente con eEPOC en planta de hospitalización f | Opciones Si/ No |
| 51 | VMNICI | ¿Hay disponibilidad para el tratamiento con (VMNI) del paciente con eEPOC en unidad de cuidados intermedios? | ¿Hay disponibilidad para el tratamiento con (VMNI) del paciente con eEPOC en unidad de cuidados intermed | Opciones Si/ No |
| 52 | VMNIOtras | ¿Hay disponibilidad para el tratamiento con (VMNI) del paciente con eEPOC en otras áreas asistenciales? | ¿Hay disponibilidad para el tratamiento con (VMNI) del paciente con eEPOC en otras áreas asistenciales diferentes a las anteriormente expuestas? | Opciones Si/ No |
| 53 | VMNIOtrasE | Especificar Áreas asistenciales y que especialistas médicos la controlan | Especificar Áreas asistenciales y que especialistas médicos la controlan: | Debe estar deshabilitada si la respuesta a la variable 52 es negativa. Pregunta abierta que aclara la variable 52, debe dejarse para rellenar. Debe tener como mínimo el nombre de un area asistencial y el nombre de una especialidad medica. Las areas asistenciales que se excluyen por estar incluidas en otras variables son: UCI, Unidad de cuidados intermedios, Hospitalización y Urgencias, |
| 54 | VMNISUHLab | ¿Hay disponibilidad para el tratamiento con VMNI del paciente con eEPOC en Urgencias en horario laboral? | ¿Hay disponibilidad para el tratamiento con VMNI del paciente con eEPOC en Urgencias en horario laboral? | Opciones Si/ No |
| 55 | VMNISUNoHLab | ¿Hay disponibilidad para el tratamiento con VMNI del paciente con eEPOC en Urgencias fuera del horario laboral? | ¿Hay disponibilidad para el tratamiento con VMNI del paciente con eEPOC en Urgencias fuera del horario l | Opciones Si/ No |
| 56 | RespVMNI | ¿Dispone el hospital de respiradores específicos para VMNI? | ¿Dispone el hospital de respiradores específicos para VMNI? | Opciones Si/ No |
| 57 | EquVMNI | Señalar los equipos de VMNI utilizados con mayor frecuencia en el centro en la actualidad | Señalar la descripción que mas se acerque al tipo de equipo de VMNI utiliza con mayor frecuencia en la actualidad el centro | Opciones: 1. Domiciliario (Tipo BiPAP de circuito único y ventilacion con fuga para manejo de paciente agudo)/ 2.Tipo BiPAP con presión de circuito unico, ambito hospitalario tipo Vision ® de Respironics/ 3. Multimodal o multifunción con modos de presion soporte y ventilación sin fugas de circuito doble. 4. Otra (Explique) |
| 58 | RPresVMNI | ¿Utilizan respirador de presión de soporte como modo de VMNI? | ¿Utilizan respirador de presión de soporte como modo de VMNI? | Opciones Si/ No |
| 59 | RVoluVMNI | ¿Utilizan respirador volumétrico como modo de VMNI? | ¿Utilizan respirador volumétrico como modo de VMNI? | Opciones Si/ No |
| 60 | CPAPVMNI | ¿Utilizan CPAP como modo de soporte ventilatorio en pacientes agudos? | ¿Utilizan CPAP como modo de soporte ventilatorio en pacientes agudos? | Opciones Si/ No |
| 61 | Protocolo | ¿Existe en el Hospital un protocolo para valoración e ingreso en UCI de los pacientes (aplicable a pacientes ????? Completar) | ¿Existe en el Hospital un protocolo para valoración e ingreso en UCI de los pacientes (aplicable a pacie | Opciones Si/ No |
| 62 | AnaCliSU | ¿Está disponible en Urgencias la realización de análisis clínicos? | ¿Está disponible en Urgencias la realización de análisis clínicos? | Opciones Si/ No |
| 63 | GasoArtSU | ¿Está disponible en Urgencias la realización de gasometría arterial? | ¿Está disponible en Urgencias la realización de gasometría arterial? | Opciones Si/ No |
| 64 | PulsioSU | ¿Está disponible en Urgencias la realización de pulsioximetría? | ¿Está disponible en Urgencias la realización de pulsioximetría? | Opciones Si/ No |
| 65 | RToraxSU | ¿Está disponible en Urgencias la realización de radiografía de tórax? | ¿Está disponible en Urgencias la realización de radiografía de tórax? | Opciones Si/ No |
| 66 | FPicoSU | ¿Está disponible en Urgencias la realización de la medida del Flujo-pico? (Peak-Flow) | ¿Está disponible en Urgencias la realización de la medida del Flujo-pico? (Peak-Flow) | Opciones Si/ No |
| 67 | EspSU | ¿Está disponible en Urgencias la realización de espirometría? | ¿Está disponible en Urgencias la realización de espirometría? | Opciones Si/ No |
| 68 | TACtoraSU | ¿Está disponible en Urgencias la realización de TAC torácico? | ¿Está disponible en Urgencias la realización de TAC torácico? | Opciones Si/ No |
| 69 | ElectroSU | ¿Está disponible en Urgencias la realización de electrocardiograma? | ¿Está disponible en Urgencias la realización de electrocardiograma? | Opciones Si/ No |
| 70 | EcoSU | ¿Está disponible en Urgencias la realización de ecocardiograma? | ¿Está disponible en Urgencias la realización de ecocardiograma? | Opciones Si/ No |
| 71 | CatCarSU | ¿Está disponible en Urgencias la realización de cateterismo cardiaco? | ¿Está disponible en Urgencias la realización de cateterismo cardiaco? | Opciones Si/ No |
| 72 | HemoculSU | ¿Está disponible en Urgencias la realización de análisis microbiológicos? | ¿Está disponible en Urgencias la realización de análisis microbiológicos? | Opciones Si/ No |
| 73 | EspRespVMNI | Especialidad responsable de la VMNI fuera de UCI o Cuidados Intermedios | Especialidad responsable de la VMNI fuera de UCI o Cuidados Intermedios | Opciones: Neumología/ Medicina Interna/ Medicina critica/ Otros. |
|  |  |  |  |  |
| **FORMULARIO DE ESPECÍFICOS PARA EPOC (FEPOC)** | | | | |
| 1 | PMLEPOCSU | ¿Existe protocolo médico local de manejo de exacerbaciones EPOC aplicado desde Urgencias? | Protocolo médico, vía clínica o guía de práctica clínica implantada a nivel local | Opciones Si/ No |
|  | PMLEPOCHP | ¿Existe protocolo médico local de manejo de exacerbaciones EPOC aplicado en hospitalización? | Protocolo médico, vía clínica o guía de práctica clínica implantada a nivel local | Opciones Si/ No |
|  | PELEPOCSU | ¿Existe protocolo de enfermería local de manejo de exacerbaciones EPOC aplicado desde Urgencias? | Protocolo de actuación de enfermería implantado a nivel local | Opciones Si/ No |
| 2 | PELEPOCHP | ¿Existe protocolo de enfermería local de manejo de exacerbaciones EPOC aplicado en hospitalización? | Protocolo de actuación de enfermería implantado a nivel local | Opciones Si/ No |
| 3 | ZonaH | ¿Hay una zona de hospitalización específica de EPOC? | ¿Hay una zona de hospitalización específica de EPOC? | Opciones Si/ No |
| 4 | NZonaH | Número de camas de hospitalización específicas de EPOC | Número de camas de hospitalización específicas de EPOC | Valor positivo mayor o igual a 0. Debe estar deshabilitada si la respuesta a la variable 3 es negativa |
| 5 | NeEPOC | Número de enfermeras dedicadas a EPOC | Número de enfermeras dedicadas a EPOC | Valor positivo mayor o igual a 0. |
| 6 | NeES | Número de enfermeras dedicadas a educación sanitaria | Número de enfermeras dedicadas a educación sanitaria en general | Valor positivo mayor o igual a 0. |
| 7 | PRehaEP | ¿Existe un programa de rehabilitación respiratoria formal? | ¿Existe un programa de rehabilitación respiratoria formal (incluyendo entrenamiento en esfuerzo)? | Opciones Si/ No |
| 8 | CET | ¿Existe una consulta especializada para el tratamiento del tabaquismo del hospital? | ¿Existe una consulta especializada para el tratamiento del tabaquismo del hospital? | Opciones Si/ No |
| 9 | CETR | ¿Quién es el responsable? | ¿Quién es el responsable? | Opciones: Neumología/ Medicina Interna/ Medicina Preventiva/ Neumo y MI/ Neumo y M. Preventiva/ M. Preventiva y MI/ Neumo, MI y M. Preventiva. Debe estar deshabilitada si la respuesta a la variable 8 es negativa |
| 10 | EnfsEP | ¿Los pacientes con EPOC tienen acceso a una enfermera especializada en EPOC o cuidados respiratorios? | ¿Los pacientes con EPOC tienen acceso a una enfermera especializada en EPOC o cuidados respiratorios? | Opciones Si/ No |
| 11 | APEP | ¿Existe un programa de Alta Precoz (A.P) para pacientes con eEPOC? | ¿Existe un programa de Alta Precoz (A.P) para pacientes con eEPOC? | Opciones Si/ No |
| 12 | APreEP | ¿Cuantos años lleva en funcionamiento este programa? | ¿Cuantos años lleva en funcionamiento este programa? | Valor positivo mayor o igual a 0. Debe estar deshabilitada si la respuesta a la variable 11 es negativa |
| 13 | NPAPreEP | Nº de pacientes que fueron dados de alta con este programa de AP en 2007 | Nº de pacientes que fueron dados de alta con este programa de AP en 2007 | Valor positivo mayor o igual a 0. Debe estar deshabilitada si la respuesta a la variable 11 es negativa |
| 14 | HDAPEP | ¿Cuantas horas al día funciona el programa de AP? | ¿Cuantas horas al día funciona el programa de AP? | Valor positivo mayor o igual a 0. Debe estar deshabilitada si la respuesta a la variable 11 es negativa |
| 15 | DSAPEP | ¿Cuantos días a la semana funciona el programa de AP? | ¿Cuantos días a la semana funciona el programa de AP? | Valor positivo mayor o igual a 0. Debe estar deshabilitada si la respuesta a la variable 11 es negativa |
| 16 | APasignEnfEP | ¿El programa de AP tiene asignado enfermero? | ¿El programa de AP tiene asignado enfermero? | Opciones Si/ No. Debe estar deshabilitada si la respuesta a la variable 11 es negativa |
| 17 | APasignfisEP | ¿El programa de AP tiene asignado fisioterapeuta? | ¿El programa de AP tiene asignado fisioterapeuta? | Opciones Si/ No. Debe estar deshabilitada si la respuesta a la variable 11 es negativa |
| 18 | APasignNeuEP | ¿El programa de AP tiene asignado neumólogo? | ¿El programa de AP tiene asignado neumólogo? | Opciones Si/ No. Debe estar deshabilitada si la respuesta a la variable 11 es negativa |
| 19 | APasignMedAtPEP | ¿El programa de AP tiene asignado médico de atención Primaria? | ¿El programa de AP tiene asignado médico de atención Primaria? | Opciones Si/ No. Debe estar deshabilitada si la respuesta a la variable 11 es negativa |
| 20 | APasignAtPEP | ¿En el programa de AP participa Atención Primaria de forma activa? | ¿En el programa de AP participa Atención Primaria de forma activa? | Opciones Si/ No. Debe estar deshabilitada si la respuesta a la variable 11 es negativa |
| 21 | APaccedeEP | ¿Al programa de AP puede acceder cualquier paciente con independencia del servicio en el que ingresa? | ¿Al programa de AP puede acceder cualquier paciente con independencia del servicio en el que ingresa? | Opciones Si/ No. Debe estar deshabilitada si la respuesta a la variable 11 es negativa |
| 22 | SacedenAP | Servicios que acceden al programa de AP | Servicios que acceden al programa de AP | Opciones Neumología/ Medicina Interna/ Geriatria. Debe estar deshabilitada si la respuesta a la variable 11 es negativa |
| 23 | EquipAP | ¿Cuantas personas componen el equipo de AP? | ¿Cuantas personas componen el equipo de AP? | Valor positivo mayor o igual a 0. Debe estar deshabilitada si la respuesta a la variable 11 es negativa |
| 24 | HDEP | ¿Existe un programa de hospitalización domiciliaria (H.D) para pacientes con eEPOC? | ¿Existe un programa de hospitalización domiciliaria (H.D) para pacientes con eEPOC? | Opciones Si/ No |
| 25 | HDeEP | ¿Cuantos años lleva en funcionamiento este programa? | ¿Cuantos años lleva en funcionamiento este programa? | Valor positivo mayor o igual a 0. Debe estar deshabilitada si la respuesta a la variable 24 es negativa |
| 26 | NPHD6 | ¿Cuantos pacientes fueron dados de alta con el programa de hospitalización a domicilio en 2007? | ¿Cuantos pacientes fueron dados de alta con el programa de hospitalización a domicilio en 2007? | Valor positivo mayor o igual a 0. Debe estar deshabilitada si la respuesta a la variable 24 es negativa |
| 27 | HDHDEP | ¿Cuantas horas al día funciona el programa de HD? | ¿Cuantas horas al día funciona el programa de HD? | Valor positivo mayor o igual a 0. Debe estar deshabilitada si la respuesta a la variable 24 es negativa |
| 28 | DSHDEP | ¿Cuantos días a la semana funciona el programa de HD? | ¿Cuantos días a la semana funciona el programa de HD? | Valor positivo mayor o igual a 0. Debe estar deshabilitada si la respuesta a la variable 24 es negativa |
| 29 | HDasignEnfEP | ¿El programa de HD tiene asignado enfermero? | ¿El programa de HD tiene asignado enfermero? | Opciones Si/ No. Debe estar deshabilitada si la respuesta a la variable 24 es negativa |
| 30 | HDasignfisEP | ¿El programa de HD tiene asignado fisioterapeuta? | ¿El programa de HD tiene asignado fisioterapeuta? | Opciones Si/ No. Debe estar deshabilitada si la respuesta a la variable 24 es negativa |
| 31 | HDasignNeuEP | ¿El programa de HD tiene asignado neumólogo? | ¿El programa de HD tiene asignado neumólogo? | Opciones Si/ No. Debe estar deshabilitada si la respuesta a la variable 24 es negativa |
| 32 | HDPteEEP | ¿Atiende el HD pacientes con exacerbación de EPOC? | ¿Atiende el HD pacientes con exacerbación de EPOC? | Opciones Si/ No. Debe estar deshabilitada si la respuesta a la variable 24 es negativa |
| 33 | HDasignMedAtPEP | ¿El programa de HD tiene asignado médico de atención Primaria? | ¿El programa de HD tiene asignado médico de atención Primaria? | Opciones Si/ No. Debe estar deshabilitada si la respuesta a la variable 24 es negativa |
| 34 | HDasignAtPEP | ¿En el programa de HD participa Atención Primaria de forma activa? | ¿En el programa de HD participa Atención Primaria de forma activa? | Opciones Si/ No. Debe estar deshabilitada si la respuesta a la variable 24 es negativa |
| 35 | HDaccedeEP | ¿Al programa de HD puede accederse desde el Servicio de Urgencias ? | ¿Al programa de HD puede accederse desde el Servicio de Urgencias ? | Opciones Si/ No. Debe estar deshabilitada si la respuesta a la variable 24 es negativa |
| 36 | EquipHD | ¿Cuantas personas componen el equipo de HD? | ¿Cuantas personas componen el equipo de HD? | Valor positivo mayor o igual a 0. Debe estar deshabilitada si la respuesta a la variable 24 es negativa |
| 37 | UHDiaSU | ¿Hay Unidad de Hospital de día? | ¿Hay Unidad de Hospital de día? | Opciones Si/ No |
| 38 | NCHDiaSU | Nº de camas del hospital de día | Nº de camas del hospital de día | Valor positivo mayor o igual a 0. Debe estar deshabilitada si la respuesta a la variable 37 es negativa |
| 39 | SMIEPOCDia | ¿Atiende el servicio de MI pacientes con EPOC en el hospital de día? | ¿Atiende el servicio de MI pacientes con EPOC en el hospital de día? | Opciones Si/ No. Debe estar deshabilitada si la respuesta a la variable 37 es negativa |
| 40 | SNEPOCDia | ¿Atiende el servicio de Neumología pacientes con EPOC en el hospital de día? | ¿Atiende el servicio de Neumología pacientes con EPOC en el hospital de día? | Opciones Si/ No. Debe estar deshabilitada si la respuesta a la variable 37 es negativa |
| 41 | SGeEPOCDia | ¿Atiende el servicio de Geriatría pacientes con EPOC en el hospital de día? | ¿Atiende el servicio de Geriatría pacientes con EPOC en el hospital de día? | Opciones Si/ No. Debe estar deshabilitada si la respuesta a la variable 37 es negativa |
| 42 | NpEPOCHospDia | Nº de pacientes con eEPOC ingresados en Hospital de día en 2007 | Nº de pacientes con eEPOC ingresados en Hospital de día en 2007 | Valor positivo mayor o igual a 0. Debe estar deshabilitada si la respuesta a la variable 37 es negativa o el valor de la variable 38 es igual a 0 |

Variables AUDIPOC España Estudio de consistencia:

| **Nº** | **VARIABLE** | **DESCRIPCIÓN** |
| --- | --- | --- |
| 1 | Número de auditoría | Campo automático prediligenciado |
| 2 | Fecha de ingreso | Campo automático prediligenciado |
| 3 | ¿Se incluye definitivamente el paciente? | Opciones de respuesta:Sí (en cuyio caso se debe responder de la pregunta 5 en adelante / No: (en cuyo caso sólo aparece pregunta 4 y termina el formulario) |
| 4 | Criterios por los que se desestima definitivamente el caso | Opciones de respuesta: Otro diagnóstico específico/ Otra patología respiratoria asociada que condiciona el cuidado/ Otra patología de vía aérea/ Cardiopatía importante con insuficiencia cardiaca crónica/ Carcinoma broncogénico u otra neoplasia torácica no controlada/ C4Patología extrapulmonar que condiciona el cuidado |
| 5 | Fuentes de la información | Opciones de respuesta: Historia clínica en papel/ Hoja de enfermería/ Información laboratorio función pulmonar/ Registros procedentes de Atención Primaria /Historia clínica informatizada/ Informe de urgencias/ Otras fuentes |
| 6 | Fecha de nacimiento | Formato dd/mm/aaaa |
| 7 | Criterios por los que se incluye definitivamente el caso | Campo de texto libre |
| 8 | ¿Ha sido atendido el paciente durante el actual ingreso en una Unidad de Cuidados Intensivos (UCI o Intermedios)? | Opciones de respuesta: Si/ No |
| 9 | Comorbilidad clínicamente relevante | Opciones de respuesta: Si/ No |
| 10 | Cambios en el color del esputo | Opciones de respuesta: Si/ No |
| 11 | Edemas maleolares, identificado en cualquier momento del ingreso | Opciones de respuesta: Si/ No |
| 12 | Tratamiento en los siete días previos al ingreso | Opciones de respuesta: Si/ No |
| 13 | ¿Tiene espirometría previa al ingreso actual? | Opciones de respuesta: Si/ No |
| 14 | ¿Se dispone de los datos espirométricos previos al ingreso? | Si la 13 es afirmativa. Opciones de respuesta: Si/No |
| 15 | Gasometría al ingreso en urgencias | Opciones de respuesta: Si/ No |
| 16 | Rx. Torax en las primeras 24 horas | Opciones de respuesta: Si/ No |
| 17 | ¿Hallazgos relevantes? | Si la pregunta 16 es afirmativa. Opciones de respuesta: Si/ No |
| 18 | Indicar hallazgos relevantes | Si la pregunta 17 es afirmativa. |
| 19 | Gram de esputo en las primeras 24 horas | Opciones de respuesta: Si/ No |
| 20 | ¿Ha sido tratado durante el ingreso con glucocorticoides intravenosos y/o orales? | Opciones de respuesta: Sistémicos (IV y/o orales)/ No ha sido tratado |
| 21 | ¿Ha tenido un pH menor de 7,35 en cualquier momento del ingreso? | Opciones de respuesta: Si/ No |
| 22 | ¿Se realizó una gasometría dentro de las 12 horas siguientes a la detección de la acidosis? | Opciones de respuesta: Si/ No |
| 23 | ¿Recibió soporte ventilatorio en cualquier momento del ingreso? | Opciones de respuesta: Si/ No |
| 24 | Procedimiento del soporte ventilatorio | Si la pregunta 23 es afirmativa. Opciones de respuesta: Si/ No |
| 25 | ¿Existe documentado algún tipo de intervención antitabaco? | Opciones de respuesta: Si/ No |
| 26 | ¿Se incluye en el informe de alta vacunación antigripal? | Opciones de respuesta: Si/No |
| 27 | Fallecimiento del paciente durante todo el periodo de ingreso | Opciones de respuesta: Si/No |
| 28 | ¿Ha tenido el paciente algún ingreso hospitalario por cualquier motivo en los 90 días posteriores? | Si la pregunta 27 es negativa: Opciones de respuesta: Si/ No |
| 29 | ¿Permanecía vivo el paciente a los 90 días tras el alta? | Si la pregunta 27 es negativa. Opciones de respuesta Si/No |
